# Supplementary material for: La lunga durata del Census Reservativus. Forme di credito e contratti agrari tra medioevo ed età moderna
Source: MDPI journal article supplement (doi:10.3390/biom14010031), 2008-01-01
Supplement: s1 [file s1]

**Table S1. Antibodies used in this study**

| Target                    | Host   | Source                       | Working dilution         |
|---------------------------|--------|------------------------------|--------------------------|
| DYRK1A                    | Mouse  | Santa Cruz (RR.7; sc-100376) | WB (1:1000); IP (2.5 µg) |
| DYRK1A                    | Rabbit | Abcam (ab69811)              | ChIP (10 µg)             |
| eIF2 $\alpha$             | Rabbit | Cell Signaling (9722)        | WB (1:1000)              |
| eIF2 $\alpha$ -p (pSer51) | Rabbit | Cell Signaling (9721)        | WB (1:1000)              |
| eIF3A                     | Rabbit | Bethyl (A302-002A)           | WB (1:200)               |
| RNA polymerase II (Rpb1)  | Rabbit | Cell Signaling (14958)       | ChIP (10 µg)             |
| p70-S6K                   | Rabbit | Cell Signaling (9202)        | WB (1:1000)              |
| p70-S6K-p (pThr389)       | Rabbit | Cell Signaling (9205)        | WB (1:1000)              |
| RPL10A                    | Mouse  | Abnova (3G2; H00004736-M01)  | WB (1:1000)              |
| RPS11                     | Rabbit | Abcam (ab175213)             | WB (1:1000)              |
| $\alpha$ -Tubulin         | Mouse  | Sigma (DM1A; T6199)          | WB (1:10000)             |
| Vinculin                  | Mouse  | Sigma (hVIN-1; V9131)        | WB (1:10000)             |
| ZBTB33/KAISO              | Mouse  | Santa Cruz (6F8; sc-23871)   | ChIP (10 µg)             |
| Anti-Mouse-HRP            | Rabbit | Dako (P0260)                 | WB (1:2000-10000)        |
| Anti-Rabbit-HRP           | Goat   | Dako (P0448)                 | WB (1:2000)              |

ChIP: Chromatin immunoprecipitation; IP: immunoprecipitation; WB: Western blot

**Table S2. ENCODE datasets used in the analysis of chromatin occupancy**

| Factor | Cell Line | Sample      | Dataset     |
|--------|-----------|-------------|-------------|
| GABPA* | SK-N-SH   | GSM1010739  | GSE32465    |
| GABPA* | HeLa      | GSM803454   | GSE32465    |
| MYC    | GM12868   | GSM822290   | GSE33213    |
| SP1    | GM12868   | GSM803363   | GSE32465    |
| TAF1   | K562      | ENCFF101GBL | ENCSR000BKS |
| TBP    | HeLa      | GSM935606   | GSE31477    |
| TBP    | GM12868   | GSM935277   | GSE31477    |
| TBP    | K562      | GSM935495   | GSE31477    |
| TBPL1  | K562      | ENCFF167PVP | ENCSR783EPA |
| YY1    | GM12868   | GSM803406   | GSE32465    |
| YY1    | SK-N-SH   | GSM1010897  | GSE32465    |
| ZBED1  | K562      | ENCFF465PNK | ENCSR286PCG |
| ZNF281 | HepG2     | ENCFF948PYK | ENCSR403MJY |

\*, GABPA data has been used as a proxy for GABP chromatin occupancy

**Table S3. Primers for ChIP-qPCR**

| Gene          | Forward primer        | Reverse primer         |
|---------------|-----------------------|------------------------|
| <i>RPS2</i>   | CGAGACCTACTGGGAAGCAG  | GGAGCCAATCACACAGGTTGTC |
| <i>RPS3A</i>  | ATAACAGGGCAAAGGTCACG  | TTTCGTAAGGCGCTTGTCT    |
| <i>RPS5</i>   | GCTGACCCGGAAGTTTTCTT  | CACCTGAGAACACAGCCTGA   |
| <i>RPS6</i>   | CATCTTGAAGCAGCTGAACCG | CTCACTTCCGCTATCCCGTA   |
| <i>RPS7</i>   | GTTTCCGCCTCTTGTTCT    | AAAAGTTCTGTCTGGAGAGCAG |
| <i>RPS9</i>   | AAACAGAGAGGGTGGTTGA   | CCACAACCTACGCCAAAACCT  |
| <i>RPS11</i>  | GCTGAAGGCTGGTCACATCT  | GGGCACTGTGAAGGACTGAC   |
| <i>RPS15A</i> | GGAGAGCGCACGGAGTTAT   | CCTTCCCTCACCCCTCGT     |
| <i>RPS19</i>  | AACTTTTCGCCCTGAGAGAGG | CAGGGGAAAGGGAACGAC     |
| <i>RPL4</i>   | CCTTTTTGCGGAATAATCCAT | TCTTCAACTTCCGTCTGCAA   |
| <i>RPL7A</i>  | CCGCCTCGATTTTCTAGCTTT | CGGGAGGAGAGAGAAAGGAA   |
| <i>RPL10</i>  | GCAAGCTCAGGGACACTCTC  | CTTGGGCGTAGAACTCTTGC   |
| <i>RPL10A</i> | CAACCGCTCTGCGGGTAG    | GCGCTAACCGGAAAAGAGAC   |
| <i>RPL12</i>  | GCGGACAAGCCAGATATAGG  | CTGCCCACAACAAACATGG    |
| <i>RPL17</i>  | AGGCTGCTTAGGGAAAGAGG  | TGCCTCCTCAGATTCGTTT    |
| <i>RPL18</i>  | GGGCGTTTCCTTATCAGGTT  | GATCATCTCGGGTTAGAGCCTT |
| <i>RPL23</i>  | ACCAGGGCCTAATCCAGTCT  | GGAGAGTTGAGATGGCAGGA   |
| <i>RPL26</i>  | CCGCAAAAGGGAAGAGAACT  | CAGTTTACTCCCCTCGCTCA   |
| <i>RPL27A</i> | GGATCACCAACCCTCAGAAAG | CCTCACTTCCGGTCACAGAG   |

**Table S4. Primers for RT-qPCR**

| Gene                      | Forward primer       | Reverse primer        |
|---------------------------|----------------------|-----------------------|
| <i>Act42a<sup>a</sup></i> | GCGTCGGTCAATTCAATCTT | AAGCTGCAACCTCTTCGTCA  |
| <i>DYRK1A</i>             | CCTTGATAGGCAAAGGTTCC | CGCACTTCTATCTGTGCTTG  |
| <i>EIF4E2</i>             | ATGATGACAGTGGGGACCAT | GTTGTACTGCAGGGGATGCT  |
| <i>RPS2</i>               | AAGATCAAGTCCCTGGAGGA | TGCTTCTGCACTGGCATAAT  |
| <i>RPS6</i>               | AGAAGATGATGTCCGCCAGT | CTGCAGGACACGTGGAGTAA  |
| <i>RPS15A</i>             | AACCTCACAGGCAGGCTAAA | CGGGATGGAAGCAGATTATT  |
| <i>RPS19</i>              | CAAAGAGCTTGCTCCCTACG | TTCTCTGACGTCCCCCATAG  |
| <i>RPS24</i>              | CGTGCGCGTTGATATGATT  | GCGGATAGTTACGGTGTCTGT |
| <i>RPL7</i>               | GGAACCATGGAGGGTGTAGA | TTTCTCAGGCGCTTGATCTT  |
| <i>RPL7A</i>              | AGAAGGCCAAGGGAAAGAAG | AGGTCTCTTTTGGGCTGGAT  |
| <i>RPL14</i>              | GTGCATGCAGCTCACTGATT | TTCAATCTTCTTGCCCATC   |
| <i>RPL17</i>              | GCTGCACATGCTTAAAAACG | GCGCATCTTAGGTGCTTTGT  |
| <i>RPL21</i>              | AGTTGTTCTTTGGCCACATA | GGTAACACTTGTGGGGCATT  |

|              |                      |                      |
|--------------|----------------------|----------------------|
| <i>RPL26</i> | GGAAAAGGCTAATGGCACAA | TCCTTTCCTACTTGGCGAGA |
|--------------|----------------------|----------------------|

<sup>a</sup>, primers targeting *Act42a* from *D. melanogaster*
