# Supplementary material for: Loss of the DYRK1A Protein Kinase Results in the Reduction in Ribosomal Protein Gene Expression, Ribosome Mass and Reduced Translation
Source: Biomolecules. 2023 Dec 25;14(1):31. doi: 10.3390/biom14010031 (PMC10813206; doi:10.3390/biom14010031)
Supplement: Supplementary file 1 [file biomolecules-14-00031-s001.zip]

Archive with 5 entries (5 files):
- 1_Supplementary_Information.pdf
- 2_Supplementary Figures.pdf
- 3_Tables S1-S4.pdf
- 4_Tables S5-S12.xlsx
- Original_data.zip
