# Supplementary material for: Loss of the DYRK1A Protein Kinase Results in the Reduction in Ribosomal Protein Gene Expression, Ribosome Mass and Reduced Translation
Source: Biomolecules. 2023 Dec 25;14(1):31. doi: 10.3390/biom14010031 (PMC10813206; doi:10.3390/biom14010031)
Supplement: Supplementary file 1 [file biomolecules-14-00031-s001.zip › 4_Tables S5-S12.xlsx]

## Sheet: Table S5
ensembl_gene_id	NewName	Name	chr	start	end	strand	Paralog	DYRK1A-MOTIF	q-value_DYRK1A-MOTIF	p-value_DYRK1A-MOTIF	matched_sequence	second_matched_sequence	DYRK1A-binding_T98G	log2 (p-value)_T98G	DYRK1A-binding_HeLa	log2 (p-value)_HeLa	DYRK1A-binding_U2OS	log2 (p-value)_U2OS	Mean Expression in T98G	Mean Expression HeLa
ENSG00000204628	RACK1	RACK1/GNB2L1	chr5	181236927	181243906	-	accesory	MOTIF_NO	NA	NA	-	-	NODYRK1A	0	NODYRK1A	0	NODYRK1A	0	70801.8	92575.6
ENSG00000147403	uL16	RPL10	chrX	154398064	154402339	+	paralog	MOTIF	0.0516	1.46e-05	TCTCGCGACC	TCTCGCGGTC	NODYRK1A	0	NODYRK1A	0	NODYRK1A	0	57003	70913.5
ENSG00000198755	uL1	RPL10A	chr6	35468400	35470781	+		MOTIF	0.0135	2.27e-06	TCTCGCGATA		DYRK1A	2.5846	DYRK1A	4.99979	DYRK1A	2.45931	23805.4	23095.5
ENSG00000165496	-	RPL10L	chr14	46651012	46651825	-	paralog (reactivated pseudogene)	MOTIF	0.0723	2.35e-05	TCCCGCGAGG		NODYRK1A	0	NODYRK1A	0	NODYRK1A	0	ND	ND
ENSG00000142676	uL5	RPL11	chr1	23691778	23696425	+		MOTIF_NO	NA	NA	-	-	NODYRK1A	0	NODYRK1A	0	NODYRK1A	0	37234.2	50395.1
ENSG00000197958	uL11	RPL12	chr9	127447673	127451432	-		MOTIF	0.0135	2.27e-06	TCTCGCGATA	TATCGTGAGT	DYRK1A	2.83842	DYRK1A	5.04128	DYRK1A	3.40153	28838	35729.8
ENSG00000167526	eL13	RPL13	chr16	89560656	89566829	+		MOTIF_NO	NA	NA	-	-	NODYRK1A	0	NODYRK1A	0	NODYRK1A	0	33480.5	29538
ENSG00000142541	uL13	RPL13A	chr19	49487553	49492308	+		MOTIF_low	0.309	0.000223	TCACGTGGGG		NODYRK1A	0	NODYRK1A	0	NODYRK1A	0	49224	49453.1
ENSG00000188846	eL14	RPL14	chr3	40457338	40462372	+		MOTIF_NO	NA	NA	-	-	NODYRK1A	0	NODYRK1A	0	DYRK1A	1.98966	20554	28846.5
ENSG00000174748	eL15	RPL15	chr3	23916803	23920856	+		MOTIF	0.151	6.83e-05	TCTCGCGGAG	TCTCGAGAGG	DYRK1A	1.6602	NODYRK1A	0	NODYRK1A	0	29749.8	38532.7
ENSG00000265681	uL22	RPL17	chr18	49488480	49492565	-		MOTIF	0.00827	7.46e-07	TCTCGCGAGA		DYRK1A	3.05064	DYRK1A	4.47687	DYRK1A	2.94275	226.525	193.012
ENSG00000063177	eL18	RPL18	chr19	48615326	48619418	-		MOTIF	0.14	6.15e-05	TCGCGCGGTG	TCTCGCGCTG	NODYRK1A	0	DYRK1A	3.13788	NODYRK1A	0	24592.7	22951.8
ENSG00000105640	eL20	RPL18A	chr19	17859877	17863324	+		MOTIF_low	0.321	0.000274	TACCGTGAGA		NODYRK1A	0	NODYRK1A	0	NODYRK1A	0	20472.8	18585.8
ENSG00000108298	eL19	RPL19	chr17	39200282	39204727	+		MOTIF_NO	NA	NA	-	-	NODYRK1A	0	NODYRK1A	0	NODYRK1A	0	51299.6	60952.9
ENSG00000122026	eL21	RPL21	chr13	27251554	27256568	+		MOTIF_NO	NA	NA	-	-	NODYRK1A	0	NODYRK1A	0	NODYRK1A	0	37838.1	46028
ENSG00000116251	eL22	RPL22	chr1	6185019	6199619	-	paralog	MOTIF_NO	NA	NA	-	-	NODYRK1A	0	NODYRK1A	0	NODYRK1A	0	14319.8	22297.8
ENSG00000163584	-	RPL22L1	chr3	170864874	170870256	-	paralog	MOTIF	0.0978	3.53e-05	TCTCGCGGCC		NODYRK1A	0	NODYRK1A	0	NODYRK1A	0	1371.55	2149.15
ENSG00000125691	uL14	RPL23	chr17	38850067	38853800	-		MOTIF	0.0428	1.16e-05	TCTCGCGGTG	TATCGTGGGA	NODYRK1A	0	DYRK1A	2.72396	DYRK1A	1.96189	36128.7	48843.3
ENSG00000198242	uL23	RPL23A	chr17	28719981	28724356	+		MOTIF_low	0.315	0.00026	ACTCGCGATG		DYRK1A	1.81231	DYRK1A	3.53645	DYRK1A	2.06063	34078.6	44246.5
ENSG00000114391	eL24	RPL24	chr3	101681089	101686719	-		MOTIF_low	0.315	0.000263	CCTCGCGATG		DYRK1A	1.5696	DYRK1A	2.95261	DYRK1A	1.74116	18918.1	23898
ENSG00000161970	uL24	RPL26	chr17	8377515	8383247	-	paralog	MOTIF	0.00827	7.46e-07	TCTCGCGAGA		DYRK1A	2.02562	DYRK1A	3.26788	DYRK1A	2.85675	972.289	876.279
ENSG00000037241	-	RPL26L1	chr5	172958908	172969771	+	paralog	MOTIF_NO	NA	NA	-	-	NODYRK1A	0	NODYRK1A	0	NODYRK1A	0	2250.32	3031.45
ENSG00000131469	eL27	RPL27	chr17	42998428	43002959	+		MOTIF_NO	NA	NA	-	-	NODYRK1A	0	NODYRK1A	0	DYRK1A	1.7832	24498.4	28611.6
ENSG00000166441	uL15	RPL27A	chr11	8682447	8689872	+		MOTIF	0.016	2.88e-06	TCTCGCGGGA		DYRK1A	2.66486	DYRK1A	4.21227	DYRK1A	2.56393	30283.4	31470.6
ENSG00000108107	eL28	RPL28	chr19	55385931	55392085	+		MOTIF_NO	NA	NA	-	-	NODYRK1A	0	NODYRK1A	0	NODYRK1A	0	23729.5	21420.9
ENSG00000162244	eL29	RPL29	chr3	51993627	51995942	-		MOTIF_NO	NA	NA	-	-	NODYRK1A	0	NODYRK1A	0	DYRK1A	1.34387	22565.3	22732.1
ENSG00000100316	uL3	RPL3	chr22	39312881	39319665	-	paralog	MOTIF	0.14	5.82e-05	tctcgtgatc		DYRK1A	1.61614	NODYRK1A	0	DYRK1A	1.33842	64056.2	72036
ENSG00000156482	eL30	RPL30	chr8	98041709	98045590	-		MOTIF_NO	NA	NA	-	-	NODYRK1A	0	NODYRK1A	0	NODYRK1A	0	32998.9	43304.2
ENSG00000071082	eL31	RPL31	chr2	101002228	101006423	+		MOTIF_low	0.321	0.000277	TCTCCCGAGC		NODYRK1A	0	NODYRK1A	0	DYRK1A	1.2922	17901.8	23286.1
ENSG00000144713	eL32	RPL32	chr3	12834944	12841582	-		MOTIF_NO	NA	NA	-	-	NODYRK1A	0	NODYRK1A	0	NODYRK1A	0	23859.1	26577
ENSG00000109475	eL34	RPL34	chr4	108620557	108630484	+		MOTIF_NO	NA	NA	-	-	NODYRK1A	0	NODYRK1A	0	NODYRK1A	0	13601.3	14985.9
ENSG00000136942	uL29	RPL35	chr9	124857878	124861961	-		MOTIF_NO	NA	NA	-	-	NODYRK1A	0	DYRK1A	2.3968	NODYRK1A	0	19822.6	18330
ENSG00000182899	eL33	RPL35A	chr3	197950180	197955851	+		MOTIF_low	0.309	0.000212	TCTCTCGATA		NODYRK1A	0	NODYRK1A	0	NODYRK1A	0	20308.6	27391.3
ENSG00000130255	eL36	RPL36	chr19	5690334	5691667	+		MOTIF_NO	NA	NA	-	-	NODYRK1A	0	NODYRK1A	0	NODYRK1A	0	9755.67	10198.5
ENSG00000241343	eL42	RPL36A	chrX	101390889	101396154	+	paralog	MOTIF_NO	NA	NA	-	-	NODYRK1A	0	NODYRK1A	0	NODYRK1A	0	310.578	223.794
ENSG00000165502	-	RPL36AL	chr14	49618687	49620685	-	paralog (reactivated pseudogene)	MOTIF_NO	NA	NA	-	-	NODYRK1A	0	NODYRK1A	0	NODYRK1A	0	2779.86	3287.45
ENSG00000145592	eL37	RPL37	chr5	40831327	40835285	-		MOTIF_NO	NA	NA	-	-	NODYRK1A	0	NODYRK1A	0	DYRK1A	1.53482	30828.2	33681.3
ENSG00000197756	eL43	RPL37A	chr2	216498796	216501467	+		MOTIF_NO	NA	NA	-	-	NODYRK1A	0	NODYRK1A	0	NODYRK1A	0	36770	43643.6
ENSG00000172809	eL38	RPL38	chr17	74203655	74209880	+		MOTIF_NO	NA	NA	-	-	NODYRK1A	0	NODYRK1A	0	DYRK1A	2.1823	11657.9	12936.2
ENSG00000198918	eL39	RPL39	chrX	119786503	119791659	-	paralog	MOTIF_NO	NA	NA	-	-	NODYRK1A	0	NODYRK1A	0	NODYRK1A	0	18489.8	19751.9
ENSG00000163923	-	RPL39L	chr3	187120948	187139496	-	paralog (reactivated pseudogene)	MOTIF_low	0.104	3.89e-05	TCCCGCGAGC		NODYRK1A	0	NODYRK1A	0	DYRK1A	1.81235	311.32	376.629
ENSG00000140986	-	RPL3L	chr16	1944578	1954678	-	paralog	MOTIF_NO	NA	NA	-	-	NODYRK1A	0	NODYRK1A	0	NODYRK1A	0	1.75463	1.08257
ENSG00000174444	uL4	RPL4	chr15	66499314	66504855	-		MOTIF	0.0301	6.98e-06	TCTCGCGAGT		NODYRK1A	0	NODYRK1A	3.77801	DYRK1A	1.76319	77386.8	106830
ENSG00000221983	eL40	RPL40/UBA52	chr19	18571801	18577460	+		MOTIF_low	0.308	0.000176	GCTCGCGAGG		NODYRK1A	0	NODYRK1A	0	NODYRK1A	0	16051.1	15832.9
ENSG00000229117	eL41	RPL41	chr12	56116589	56117832	+		MOTIF_NO	NA	NA	-	-	NODYRK1A	0	NODYRK1A	0	NODYRK1A	0	14152.7	20137.3
ENSG00000122406	uL18	RPL5	chr1	92832036	92841924	+		MOTIF_NO	NA	NA	-	-	NODYRK1A	0	NODYRK1A	0	NODYRK1A	0	48209.4	69187.1
ENSG00000089009	eL6	RPL6	chr12	112405180	112409641	-		MOTIF_NO	NA	NA	-	-	NODYRK1A	0	NODYRK1A	0	NODYRK1A	0	35207	46486.8
ENSG00000147604	uL30	RPL7	chr8	73290638	73293634	-	paralog	MOTIF	0.0964	3.35e-05	TCTCGCGAAG	TCCCGTGGGG	NODYRK1A	0	NODYRK1A	0	DYRK1A	1.66035	66739.6	95496.2
ENSG00000148303	eL8	RPL7A	chr9	133348213	133351425	+		MOTIF	0.0341	8.34e-06	TCTCGCGATC		DYRK1A	2.93657	DYRK1A	0	DYRK1A	2.55408	54676	67452.8
ENSG00000146223	-	RPL7L1	chr6	42879615	42889896	+	paralog	MOTIF_NO	NA	NA	-	-	NODYRK1A	0	NODYRK1A	0	NODYRK1A	0	6841.48	12773.1
ENSG00000161016	uL2	RPL8	chr8	144789764	144792446	-		MOTIF_low	0.309	0.000219	TAGCGCGGTG		NODYRK1A	0	NODYRK1A	0	DYRK1A	1.09963	64374.5	63174.3
ENSG00000163682	uL6	RPL9	chr4	39454123	39458948	-		MOTIF_NO	NA	NA	-	-	NODYRK1A	0	NODYRK1A	0	NODYRK1A	0	21369.9	26360
ENSG00000089157	uL10	RPLP0	chr12	120196699	120201211	-		MOTIF_low	0.308	0.000192	TCTCGCCAGG		NODYRK1A	0	NODYRK1A	0	NODYRK1A	0	73856.8	94198
ENSG00000137818	P1	RPLP1	chr15	69452819	69455545	+		MOTIF_NO	NA	NA	-	-	NODYRK1A	0	NODYRK1A	0	NODYRK1A	0	38426.8	34053.8
ENSG00000177600	P2	RPLP2	chr11	809935	812876	+		MOTIF_low	0.228	0.000115	TCACGCGGCG		NODYRK1A	0	NODYRK1A	0	NODYRK1A	0	30577.7	25005.4
ENSG00000124614	eS10	RPS10	chr6	34417453	34426125	-		MOTIF_NO	NA	NA	-	-	NODYRK1A	0	NODYRK1A	0	NODYRK1A	0	58.3731	37.6706
ENSG00000142534	uS17	RPS11	chr19	49496364	49499712	+		MOTIF	0.00827	7.46e-07	TCTCGCGAGA	TCTCGCGATA	DYRK1A	3.12751	DYRK1A	5.76456	DYRK1A	3.58243	41067.4	50362.6
ENSG00000112306	eS12	RPS12	chr6	132814568	132817564	+		MOTIF_low	0.309	0.00022	TCGCGCGGAG		NODYRK1A	0	NODYRK1A	0	DYRK1A	1.36227	27513.2	25762.5
ENSG00000110700	uS15	RPS13	chr11	17074391	17077673	-		MOTIF_NO	NA	NA	-	-	NODYRK1A	0	NODYRK1A	0	NODYRK1A	0	17522.5	20767.5
ENSG00000164587	uS11	RPS14	chr5	150444228	150449756	-		MOTIF_NO	NA	NA	-	-	NODYRK1A	0	NODYRK1A	0	NODYRK1A	0	44115.5	51858.9
ENSG00000115268	uS19	RPS15	chr19	1438363	1440497	+		MOTIF	0.0135	2.27e-06	TCTCGCGATA	TCTCGCGGGG	DYRK1A	2.70469	DYRK1A	4.5655	DYRK1A	2.89438	15127.3	9432.92
ENSG00000134419	uS8	RPS15A	chr16	18782954	18790334	-		MOTIF	0.0135	2.27e-06	TCTCGCGATA		DYRK1A	2.21754	NODYRK1A	0	NODYRK1A	0	2734.12	2487.71
ENSG00000105193	uS9	RPS16	chr19	39433136	39436020	-		MOTIF_NO	NA	NA	-	-	NODYRK1A	0	NODYRK1A	0	NODYRK1A	0	25093.4	24365.7
ENSG00000182774	eS17	RPS17	chr15	82536749	82540544	-	two copies	MOTIF_low	0.217	0.000106	TCCCGCGGTC		NODYRK1A	0	NODYRK1A	0	NODYRK1A	0	12407.1	10225.5
ENSG00000231500	uS13	RPS18	chr6	33272074	33276504	+		MOTIF_NO	NA	NA	-	-	NODYRK1A	0	NODYRK1A	0	NODYRK1A	0	45035.7	50498.2
ENSG00000105372	eS19	RPS19	chr19	41859917	41871416	+		MOTIF	0.0181	7.46e-07	TCTCGCGAGA	TCTCGCGAGC	DYRK1A	2.67021	DYRK1A	5.28498	DYRK1A	2.25679	32855.7	27563.1
ENSG00000140988	uS5	RPS2	chr16	1962058	1964826	-		MOTIF	0.0251	5.49e-06	TCTCGCGGGG	TCTCGCGGCG	DYRK1A	2.36289	DYRK1A	3.8889	NODYRK1A	0	77917.3	81888
ENSG00000008988	uS10	RPS20	chr8	56072808	56074581	-		MOTIF_NO	NA	NA	-	-	NODYRK1A	0	DYRK1A	3.20897	NODYRK1A	0	45724.1	45274.8
ENSG00000171858	eS21	RPS21	chr20	62387064	62388520	+		MOTIF_low	0.314	0.000238	TCTCGCGCGC		NODYRK1A	0	NODYRK1A	0	DYRK1A	1.85607	13805.5	11539.3
ENSG00000186468	uS12	RPS23	chr5	82273319	82278416	-		MOTIF_NO	NA	NA	-	-	NODYRK1A	0	NODYRK1A	0	DYRK1A	1.33412	40171.2	49284.5
ENSG00000138326	eS24	RPS24	chr10	78033759	78040716	+		MOTIF_NO	NA	NA	-	-	NODYRK1A	0	NODYRK1A	0	DYRK1A	1.87257	29633.4	43621.6
ENSG00000118181	eS25	RPS25	chr11	119015711	119018347	-		MOTIF_NO	NA	NA	-	-	NODYRK1A	0	NODYRK1A	0	NODYRK1A	0	23336.7	27321.1
ENSG00000197728	eS26	RPS26	chr12	56041901	56044223	+		MOTIF_NO	NA	NA	-	-	NODYRK1A	0	NODYRK1A	0	NODYRK1A	0	8061.16	8664.23
ENSG00000177954	eS27	RPS27	chr1	153990762	153992155	+	paralog	MOTIF_NO	NA	NA	-	-	NODYRK1A	0	NODYRK1A	0	NODYRK1A	0	25626.5	30850.7
ENSG00000143947	eS31	RPS27A	chr2	55231902	55235853	+		MOTIF_NO	NA	NA	-	-	NODYRK1A	0	NODYRK1A	0	NODYRK1A	0	41225.6	44583.8
ENSG00000185088	-	RPS27L	chr15	63153339	63157542	-	paralog	MOTIF_NO	NA	NA	-	-	NODYRK1A	0	NODYRK1A	0	NODYRK1A	0	2807.31	4172.98
ENSG00000233927	eS28	RPS28	chr19	8321499	8322396	+		MOTIF	0.0135	2.27e-06	TCTCGCGATA		DYRK1A	2.90468	DYRK1A	5.11825	DYRK1A	3.05805	8995.04	7663.75
ENSG00000213741	uS14	RPS29	chr14	49583571	49586416	-		MOTIF_NO	NA	NA	-	-	DYRK1A	3.08116	DYRK1A	3.22543	DYRK1A	2.63562	4497.34	3481.84
ENSG00000149273	uS3	RPS3	chr11	75399490	75406913	+		MOTIF_NO	NA	NA	-	-	NODYRK1A	0	NODYRK1A	0	NODYRK1A	0	62649.9	73686
ENSG00000149806	eS30	RPS30/FAU	chr11	65120626	65122200	-		MOTIF_low	0.309	0.000223	TCACGTGGGG		NODYRK1A	0	NODYRK1A	0	NODYRK1A	0	5507.21	4869.51
ENSG00000145425	eS1	RPS3A	chr4	151099572	151104652	+		MOTIF	0.0347	8.95e-06	TCGCGCGAGA		DYRK1A	2.50894	DYRK1A	3.07905	DYRK1A	2.33126	47598.6	63812.9
ENSG00000198034	eS4	RPS4X	chrX	72272602	72277291	-		MOTIF_NO	NA	NA	-	-	NODYRK1A	0	NODYRK1A	0	NODYRK1A	0	59088.5	75831.5
ENSG00000129824	-	RPS4Y1	chrY	2841581	2866956	+	paralog	MOTIF_low	0.314	0.000234	TCACGTGAGT	TCACGTGACG	NODYRK1A	0	NODYRK1A	0	NODYRK1A	0	13148.2	3.6
ENSG00000280969	-	RPS4Y2	chrY	20756067	20781032	+	paralog	MOTIF	0.14	5.94e-05	TCCCGCGACG		NODYRK1A	0	NODYRK1A	0	NODYRK1A	0	1.78596	2.18866
ENSG00000083845	uS7	RPS5	chr19	58387268	58394804	+		MOTIF	0.14	5.99e-05	TCGCGCGGGC	TCCCGCGGCA	NODYRK1A	0	NODYRK1A	0	NODYRK1A	0	26681	25864.3
ENSG00000137154	eS6	RPS6	chr9	19376255	19380237	-		MOTIF	0.00827	7.46e-07	TCTCGCGAGA		DYRK1A	2.60457	DYRK1A	4.30046	DYRK1A	3.1082	46943	57367.4
ENSG00000171863	eS7	RPS7	chr2	3575262	3580919	+		MOTIF	0.00827	7.46e-07	TCTCGCGAGA	tctcgccatg	DYRK1A	2.6527	DYRK1A	4.66977	DYRK1A	3.17451	26058.7	31990.2
ENSG00000142937	eS8	RPS8	chr1	44775573	44778740	+		MOTIF_NO	NA	NA	-	-	NODYRK1A	0	NODYRK1A	0	NODYRK1A	0	47518.2	64117.1
ENSG00000170889	uS4	RPS9	chr19	54200857	54207647	+		MOTIF	0.14	7.46e-07	TCTCGCGAGA	TCTCGTGACG	DYRK1A	2.39428	DYRK1A	4.14526	DYRK1A	2.29951	21539.7	20099.3
ENSG00000168028	uS2	RPSA	chr3	39406688	39412542	+		MOTIF_NO	NA	NA	-	-	NODYRK1A	0	NODYRK1A	0	NODYRK1A	0	57609.2	65111.1

## Sheet: Table S6
ensembl_gene_id	Name	chr	start	end	strand	DYRK1A-MOTIF_mESCs	q-value_DYRK1A-MOTIF	p-value_DYRK1A-MOTIF	matched_sequence	DYRK1A-binding_mESCs
ENSMUSG00000037805	Rpl10a	chr17	28465415	28467977	+	MOTIF	0.00562	7.46e-07	TCTCGCGAGA	DYRK1A
ENSMUSG00000038900	Rpl12	chr2	32817078	32820016	+	MOTIF	0.00562	7.46e-07	TCTCGCGAGA	DYRK1A
ENSMUSG00000062328	Rpl17	chr18	75160130	75163035	+	MOTIF	0.00562	7.46e-07	TCTCGCGAGA	DYRK1A
ENSMUSG00000060938	Rpl26	chr11	68715084	68718036	+	MOTIF	0.00562	7.46e-07	TCTCGCGAGA	DYRK1A
ENSMUSG00000032399	Rpl4	chr9	64021193	64026369	+	MOTIF	0.00562	7.46e-07	TCTCGCGAGA	DYRK1A
ENSMUSG00000003429	Rps11	chr7	52377756	52379766	-	MOTIF	0.00562	7.46e-07	TCTCGCGAGA	DYRK1A
ENSMUSG00000067288	Rps28	chr17	33959980	33961507	-	MOTIF	0.00562	7.46e-07	TCTCGCGAGA	DYRK1A
ENSMUSG00000028495	Rps6	chr4	86500563	86503316	-	MOTIF	0.00562	7.46e-07	TCTCGCGAGA	DYRK1A
ENSMUSG00000061477	Rps7	chr12	29315711	29320818	-	MOTIF	0.00562	7.46e-07	TCTCGCGAGA	DYRK1A
ENSMUSG00000040952	Rps19	chr7	25669732	25674825	+	MOTIF	0.00566	7.46e-07	TCTCGCGAGA	DYRK1A
ENSMUSG00000046364	Rpl27a	chr7	116662660	116665881	+	MOTIF	0.00959	1.36e-06	TCTCGCGAGG	NODYRK1A
ENSMUSG00000058546	Rpl23a	chr11	77994436	77997086	-	MOTIF	0.0122	2.27e-06	TCTCGCGATA	NODYRK1A
ENSMUSG00000062647	Rpl7a	chr2	26766283	26768838	+	MOTIF	0.0122	2.27e-06	TCTCGCGATA	DYRK1A
ENSMUSG00000008683	Rps15a	chr7	125247891	125258770	-	MOTIF	0.0122	2.27e-06	TCTCGCGATA	DYRK1A
ENSMUSG00000061787	Rps17	chr7	88487618	88490140	-	MOTIF	0.0164	3.49e-06	TCTCGCGAGC	NODYRK1A
ENSMUSG00000028081	Rps3a	chr3	85941861	85946624	-	MOTIF	0.0225	4.98e-06	TCTCGCGACA	DYRK1A
ENSMUSG00000030432	Rpl28	chr7	4744475	4746164	+	MOTIF	0.0436	1.16e-05	TCTCGCGGTG	NODYRK1A
ENSMUSG00000059291	Rpl11	chr4	135605645	135609308	-	MOTIF	0.0728	2e-05	TCTCGCGGGT	NODYRK1A
ENSMUSG00000074129	Rpl13a	chr7	52380927	52384118	-	MOTIF	0.0866	2.61e-05	TCACGCGAGG	NODYRK1A
ENSMUSG00000007892	Rplp1	chr9	61761090	61762345	-	MOTIF	0.0866	2.61e-05	TCACGCGAGG	NODYRK1A
ENSMUSG00000063457	Rps15	chr10	79755197	79756859	+	MOTIF	0.0974	3.02e-05	TATCGCGAGC	NODYRK1A
ENSMUSG00000060036	Rpl3	chr15	79908210	79913836	-	MOTIF	0.113	3.6e-05	TCTCGTGAGC	NODYRK1A
ENSMUSG00000090862	Rps13	chr7	123475020	123477704	-	MOTIF	0.12	3.94e-05	TCGCGCGGGG	NODYRK1A
ENSMUSG00000036781	Rps27l	chr9	66793892	66797319	+	MOTIF	0.124	4.18e-05	TCACGCGAGC	NODYRK1A
ENSMUSG00000025508	Rplp2	chr7	148633268	148637484	+	MOTIF	0.147	5.47e-05	TCTCGTGAGT	NODYRK1A
ENSMUSG00000079435	Rpl36a	chrX	131120192	131122595	+	MOTIF	0.165	8.05e-05	TCTCGTGACC	NODYRK1A
ENSMUSG00000090137	Rpl40/Uba52	chr8	73032164	73034316	-	MOTIF	0.165	7.92e-05	TCTCGTGATT	NODYRK1A
ENSMUSG00000039209	Rpl39l	chr16	10170320	10175004	+	MOTIF	0.165	7.64e-05	TCCCGCGGTG	NODYRK1A
ENSMUSG00000017404	Rpl19	chr11	97888237	97891806	+	MOTIF	0.165	7.54e-05	TCCCGCGGGC	NODYRK1A
ENSMUSG00000028936	Rpl22	chr4	151699961	151706589	+	MOTIF	0.165	7.54e-05	TCCCGCGGGC	NODYRK1A
ENSMUSG00000061983	Rps12	chr10	23504989	23507015	-	MOTIF	0.165	7.54e-05	TCCCGCGGGC	NODYRK1A
ENSMUSG00000062006	Rpl34	chr3	130429748	130433255	-	MOTIF	0.166	8.66e-05	TCACGTGAGA	NODYRK1A
ENSMUSG00000041841	Rpl37	chr15	5066612	5069140	+	MOTIF	0.166	8.32e-05	TCACGCGGTG	NODYRK1A
ENSMUSG00000049751	Rpl36al	chr12	70283727	70285070	-	MOTIF	0.185	0.000106	TCCCGCGGTC	NODYRK1A
ENSMUSG00000031320	Rps4x	chrX	99380279	99384733	-	MOTIF	0.185	0.000106	TCCCGCGGTC	NODYRK1A
ENSMUSG00000032518	Rpsa	chr9	120036883	120041487	+	MOTIF	0.185	0.000105	TCCCGCGGCG	NODYRK1A
ENSMUSG00000059070	Rpl18	chr7	52973440	52976205	+	MOTIF	0.205	0.000122	TCACGCGACT	NODYRK1A
ENSMUSG00000058558	Rpl5	chr5	108329520	108338024	+	MOTIF	0.212	0.00013	TCTCGCGGAT	NODYRK1A
ENSMUSG00000000740	Rpl13	chr8	125626249	125629144	+	MOTIF	0.219	0.000172	TCGCGTGACG	NODYRK1A
ENSMUSG00000049517	Rps23	chr13	91062726	91064329	+	MOTIF	0.219	0.000172	TATCGTGGGG	NODYRK1A
ENSMUSG00000062997	Rpl35	chr2	38857099	38861144	-	MOTIF	0.22	0.000175	ACTCGCGAGG	DYRK1A
ENSMUSG00000067274	Rplp0	chr5	116009475	116013736	+	MOTIF	0.228	0.000192	TCTCGCCAGG	NODYRK1A
ENSMUSG00000009927	Rps25	chr9	44215796	44218488	+	MOTIF	0.229	0.000194	TCTCTCGAGG	NODYRK1A
ENSMUSG00000029614	Rpl6	chr5	121654489	121659250	+	MOTIF	0.233	0.000254	TCTCTCGGGA	NODYRK1A
ENSMUSG00000045128	Rpl18a	chr8	73418620	73421342	-	MOTIF	0.233	0.000251	TCTCCCGGGA	NODYRK1A
ENSMUSG00000012405	Rpl15	chr14	19101459	19103543	-	MOTIF	0.233	0.00023	TAGCGCGATT	NODYRK1A
ENSMUSG00000039221	Rpl22l1	chr3	28704357	28706274	+	MOTIF	0.237	0.000269	TCTAGCGAGC	NODYRK1A
ENSMUSG00000058600	Rpl30	chr15	34370264	34372977	-	MOTIF	0.237	0.000269	TCTCGCAAGC	NODYRK1A
ENSMUSG00000071415	Rpl23	chr11	97638840	97643751	-	MOTIF	0.237	0.000264	TCCCGCGGAG	NODYRK1A
ENSMUSG00000079641	Rpl39	chrX	34622514	34625397	-	MOTIF	0.252	0.000294	TCTCGCCATG	NODYRK1A
ENSMUSG00000024608	Rps14	chr18	60934163	60938200	+	MOTIF	0.252	0.000294	TCTCGCCACA	NODYRK1A
ENSMUSG00000090733	Rps27	chr3	90016592	90017573	-	MOTIF	0.252	0.000294	TCTCGCCACA	NODYRK1A
ENSMUSG00000044533	Rps2	chr17	24857054	24858874	+	MOTIF	0.261	0.000254	TCTTGCGGGA	DYRK1A
ENSMUSG00000039001	Rps21	chr2	179992081	179993150	+	MOTIF	0.261	0.000254	TCTCGCTGGA	NODYRK1A
ENSMUSG00000058600	Rps30/Fau	chr15	34370259	34373395	-	MOTIF	0.27	0.000269	TCTCGCAAGC	NODYRK1A
ENSMUSG00000020372	Rack1	chr11	48800332	48806434	+	MOTIF_NO	NA	NA	-	NODYRK1A
ENSMUSG00000008682	Rpl10	chrX	71516150	71518474	+	MOTIF_NO	NA	NA	-	NODYRK1A
ENSMUSG00000060499	Rpl10l	chr12	67384367	67385388	-	MOTIF_NO	NA	NA	-	NODYRK1A
ENSMUSG00000025794	Rpl14	chr9	120480633	120483770	+	MOTIF_NO	NA	NA	-	NODYRK1A
ENSMUSG00000041453	Rpl21	chr5	147644465	147648608	+	MOTIF_NO	NA	NA	-	NODYRK1A
ENSMUSG00000098274	Rpl24	chr16	55966275	55971435	+	MOTIF_NO	NA	NA	-	NODYRK1A
ENSMUSG00000063316	Rpl27	chr11	101303611	101306843	+	MOTIF_NO	NA	NA	-	NODYRK1A
ENSMUSG00000048758	Rpl29	chr9	106331869	106333898	+	MOTIF_NO	NA	NA	-	NODYRK1A
ENSMUSG00000073702	Rpl31	chr1	39424695	39428753	+	MOTIF_NO	NA	NA	-	NODYRK1A
ENSMUSG00000057841	Rpl32	chr6	115755522	115758765	-	MOTIF_NO	NA	NA	-	NODYRK1A
ENSMUSG00000060636	Rpl35a	chr16	33056538	33060275	+	MOTIF_NO	NA	NA	-	NODYRK1A
ENSMUSG00000057863	Rpl36	chr17	56752817	56753666	+	MOTIF_NO	NA	NA	-	NODYRK1A
ENSMUSG00000046330	Rpl37a	chr1	72757833	72760383	+	MOTIF_NO	NA	NA	-	NODYRK1A
ENSMUSG00000057322	Rpl38	chr11	114529861	114533645	+	MOTIF_NO	NA	NA	-	NODYRK1A
ENSMUSG00000002500	Rpl3l	chr17	24869629	24873094	+	MOTIF_NO	NA	NA	-	NODYRK1A
ENSMUSG00000093674	Rpl41	chr10	128548114	128549305	-	MOTIF_NO	NA	NA	-	NODYRK1A
ENSMUSG00000043716	Rpl7	chr1	16091375	16094743	-	MOTIF_NO	NA	NA	-	NODYRK1A
ENSMUSG00000063888	Rpl7l1	chr17	46910855	46919605	-	MOTIF_NO	NA	NA	-	NODYRK1A
ENSMUSG00000003970	Rpl8	chr15	76734500	76736748	+	MOTIF_NO	NA	NA	-	NODYRK1A
ENSMUSG00000047215	Rpl9	chr5	65779602	65782682	-	MOTIF_NO	NA	NA	-	NODYRK1A
ENSMUSG00000052146	Rps10	chr17	27767368	27773574	-	MOTIF_NO	NA	NA	-	NODYRK1A
ENSMUSG00000037563	Rps16	chr7	29135670	29137715	+	MOTIF_NO	NA	NA	-	NODYRK1A
ENSMUSG00000008668	Rps18	chr17	34088943	34092662	-	MOTIF_NO	NA	NA	-	NODYRK1A
ENSMUSG00000028234	Rps20	chr4	3758480	3762812	-	MOTIF_NO	NA	NA	-	NODYRK1A
ENSMUSG00000025290	Rps24	chr14	25309902	25314654	+	MOTIF_NO	NA	NA	-	NODYRK1A
ENSMUSG00000025362	Rps26	chr10	128061585	128063562	-	MOTIF_NO	NA	NA	-	NODYRK1A
ENSMUSG00000020460	Rps27a	chr11	29445845	29447860	-	MOTIF_NO	NA	NA	-	NODYRK1A
ENSMUSG00000034892	Rps29	chr12	70258708	70260173	-	MOTIF_NO	NA	NA	-	DYRK1A
ENSMUSG00000030744	Rps3	chr7	106626405	106632248	-	MOTIF_NO	NA	NA	-	NODYRK1A
ENSMUSG00000012848	Rps5	chr7	13507638	13512035	+	MOTIF_NO	NA	NA	-	NODYRK1A
ENSMUSG00000047675	Rps8	chr4	116826431	116828848	-	MOTIF_NO	NA	NA	-	NODYRK1A
ENSMUSG00000006333	Rps9	chr7	3655594	3658503	+	MOTIF_NO	NA	NA	-	NODYRK1A

## Sheet: Table S7
Locus	Gene Name	ensembl_gene_id	chr	start	end	strand	mean_expression_T98G (normalized counts)	mean_expression_HeLa (normalized counts)	DYRK1A-MOTIF_sequence	DYRK1A-MOTIF_strand
RPL12	RPL12	ENSG00000197958	chr9	127447673	127451432	-	34746.5	35940.4	TCTCGCGATA	-
RPL12	LRSAM1	ENSG00000148356	chr9	127451486	127503501	+	1023.58	735.183
RPL15	RPL15	ENSG00000174748	chr3	23916803	23920856	+	34594	35603.9	TCTCGCGGAG	+
RPL15	NKIRAS1	ENSG00000197885	chr3	23891660	23946591	-	507.066	1068.84
RPL18	RPL18	ENSG00000063177	chr19	48615326	48619418	-	27914.2	25423.5	TCGCGCGGTG	+
RPL18	SPHK2	ENSG00000063176	chr19	48619291	48630717	+	1016.04	855.103
RPL21	RPL21	ENSG00000122026	chr13	27251554	27256568	+	42714.2	51321.8	-	-
RPL21	LINC02340	ENSG00000275294	chr13	27178263	27251288	-	ND	39.5254
RPL21	LINC00412	ENSG00000234772	chr13	27236282	27236811	-	3.37949	1.45447
RPL23A	RPL23A	ENSG00000198242	chr17	28719981	28724356	+	39075.5	46893.4	ACTCGCGATG	-
RPL23A	RAB34	ENSG00000109113	chr17	28714281	28718429	-	7101.52	6799.82
RPL27A	RPL27A	ENSG00000166441	chr11	8682447	8689872	+	34141.2	34385.1	TCTCGCGGGA	-
RPL27A	TRIM66	ENSG00000166436	chr11	8612037	8671866	-	1059.48	531.912
RPL28	RPL28	ENSG00000108107	chr19	55385931	55392085	+	25081.5	22939.1	-	-
RPL28	TMEM238	ENSG00000233493	chr19	55379245	55384598	-	1.81139	2.73292
RPL34	RPL34	ENSG00000109475	chr4	108620557	108630484	+	16009.7	15811.9	-	-
RPL34	RPL34-AS1	ENSG00000234492	chr4	108538190	108620460	-	25.8488	26.4421
RPL35	RPL35	ENSG00000136942	chr9	124857878	124861961	-	22338.9	21296.6	-	-
RPL35	ARPC5L	ENSG00000136950	chr9	124862130	124877733	+	2720.87	3770.12
RPL35A	RPL35A	ENSG00000182899	chr3	197950180	197955851	+	23772	29924.9	TCTCTCGATA	-
RPL35A	IQCG	ENSG00000114473	chr3	197889075	197960142	-	611.937	1305.01
RPL36A	RPL36A	ENSG00000241343	chrX	101390889	101396154	+	441.487	337.26	-	-
RPL36A	BTK	ENSG00000010671	chrX	101349447	101390796	-	6.29947	2.8642
RPL4	RPL4	ENSG00000174444	chr15	66499314	66504855	-	89217.4	117300	TCTCGCGAGT	+
RPL4	ZWILCH	ENSG00000174442	chr15	66504959	66550128	+	2745.75	6732.49
RPL7	RPL7	ENSG00000147604	chr8	73290638	73293634	-	81175.5	100954	TCTCGCGAAG	-
RPL7	RDH10	ENSG00000121039	chr8	73294612	73325281	+	2319.39	2647.47
RPL7A	RPL7A	ENSG00000148303	chr9	133348213	133351425	+	65075.6	67966.5	TCTCGCGATC	+
RPL7A	MED22	ENSG00000148297	chr9	133338323	133348131	-	2614.7	2288.6
RPL9	RPL9	ENSG00000163682	chr4	39454123	39458948	-	26834.5	28082.7	-	-
RPL9	LIAS	ENSG00000121897	chr4	39458587	39485109	+	635.737	1068.62
RPLP0	RPLP0	ENSG00000089157	chr12	120196699	120201211	-	82906.9	92593.4	TCTCGCCAGG	-
RPLP0	PXN-AS1	ENSG00000255857	chr12	120201291	120213138	+	205.736	115.268
RPS18	RPS18	ENSG00000231500	chr6	33272074	33276504	+	54993.2	50493.8	-	-
RPS18	VPS52	ENSG00000223501	chr6	33250272	33272047	-	2479.18	2722.64
RPS2	RPS2	ENSG00000140988	chr16	1962058	1964826	-	88949.6	93400.4	TCTCGCGGGG	-
RPS2	SNHG9	ENSG00000255198	chr16	1964959	1965509	+	147.427	78.2053
RPS20	RPS20	ENSG00000008988	chr8	56072808	56074581	-	49631.8	47619.2	-	-
RPS20	CERNA3	ENSG00000253603	chr8	56074592	56075274	+	5.92257	5.92441
RPS23	RPS23	ENSG00000186468	chr5	82273319	82278416	-	48635.8	55995	-	-
RPS23	ATP6AP1L	ENSG00000205464	chr5	82279462	82386977	+	277.677	140.973
RPS25	RPS25	ENSG00000118181	chr11	119015711	119018347	-	27981.4	28659	-	-
RPS25	TRAPPC4	ENSG00000196655	chr11	119018432	119025454	+	2106.36	2737.32
RPS27A	RPS27A	ENSG00000143947	chr2	55231902	55235853	+	50055.1	50320.8	-	-
RPS27A	CLHC1	ENSG00000162994	chr2	55174791	55232563	-	400.237	322.486
RPS28	RPS28	ENSG00000233927	chr19	8321499	8322396	+	9465.87	9183.03	TCTCGCGATA	-
RPS28	NDUFA7	ENSG00000267855	chr19	8308768	8321396	-	6.65155	7.32389
RPS29	RPS29	ENSG00000213741	chr14	49583571	49586416	-	4841.12	3530.88	-	-
RPS29	LRR1	ENSG00000165501	chr14	49598697	49614672	-	951.981	1664.43
RPS29	RN7SL1	ENSG00000276168	chr14	49586580	49586878	+	ND	ND
RPS30/FAU	RPS30/FAU	ENSG00000149806	chr11	65120626	65122200	-	5689.29	5208.38	TCACGTGGGG	+
RPS30/FAU	MRPL49	ENSG00000149792	chr11	65122183	65127371	+	4016.12	5131.14

## Sheet: Table S8
ensembl_gene_id	NewName	Name	chr	start	end	strand	Paralog	DYRK1A-binding_T98G	ZBTB33-binding_T98G	log2 (p-value)_T98G
ENSG00000204628	RACK1	RACK1/GNB2L1	chr5	181236927	181243906	-	accesory	NODYRK1A	NOZBTB33	0
ENSG00000147403	uL16	RPL10	chrX	154398064	154402339	+	paralog	NODYRK1A	NOZBTB33	0
ENSG00000198755	uL1	RPL10A	chr6	35468400	35470781	+		DYRK1A	ZBTB33	2.16036
ENSG00000165496	-	RPL10L	chr14	46651012	46651825	-	paralog (reactivated pseudogene)	NODYRK1A	NOZBTB33	2.96823
ENSG00000142676	uL5	RPL11	chr1	23691778	23696425	+		NODYRK1A	NOZBTB33	2.30394
ENSG00000197958	uL11	RPL12	chr9	127447673	127451432	-		DYRK1A	ZBTB33	2.96823
ENSG00000167526	eL13	RPL13	chr16	89560656	89566829	+		NODYRK1A	NOZBTB33	0
ENSG00000142541	uL13	RPL13A	chr19	49487553	49492308	+		NODYRK1A	NOZBTB33	0
ENSG00000188846	eL14	RPL14	chr3	40457338	40462372	+		NODYRK1A	NOZBTB33	0
ENSG00000174748	eL15	RPL15	chr3	23916803	23920856	+		DYRK1A	NOZBTB33	0
ENSG00000265681	uL22	RPL17	chr18	49488480	49492565	-		DYRK1A	ZBTB33	2.30394
ENSG00000063177	eL18	RPL18	chr19	48615326	48619418	-		NODYRK1A	NOZBTB33	0
ENSG00000105640	eL20	RPL18A	chr19	17859877	17863324	+		NODYRK1A	NOZBTB33	0
ENSG00000108298	eL19	RPL19	chr17	39200282	39204727	+		NODYRK1A	NOZBTB33	0
ENSG00000122026	eL21	RPL21	chr13	27251554	27256568	+		NODYRK1A	NOZBTB33	0
ENSG00000116251	eL22	RPL22	chr1	6185019	6199619	-	paralog	NODYRK1A	NOZBTB33	0
ENSG00000163584	-	RPL22L1	chr3	170864874	170870256	-	paralog	NODYRK1A	NOZBTB33	0
ENSG00000125691	uL14	RPL23	chr17	38850067	38853800	-		NODYRK1A	NOZBTB33	0
ENSG00000198242	uL23	RPL23A	chr17	28719981	28724356	+		DYRK1A	NOZBTB33	0
ENSG00000114391	eL24	RPL24	chr3	101681089	101686719	-		DYRK1A	NOZBTB33	0
ENSG00000161970	uL24	RPL26	chr17	8377515	8383247	-	paralog	DYRK1A	NOZBTB33	0
ENSG00000037241	-	RPL26L1	chr5	172958908	172969771	+	paralog	NODYRK1A	NOZBTB33	0
ENSG00000131469	eL27	RPL27	chr17	42998428	43002959	+		NODYRK1A	NOZBTB33	0
ENSG00000166441	uL15	RPL27A	chr11	8682447	8689872	+		DYRK1A	ZBTB33	3.177
ENSG00000108107	eL28	RPL28	chr19	55385931	55392085	+		NODYRK1A	NOZBTB33	0
ENSG00000162244	eL29	RPL29	chr3	51993627	51995942	-		NODYRK1A	NOZBTB33	0
ENSG00000100316	uL3	RPL3	chr22	39312881	39319665	-	paralog	DYRK1A	NOZBTB33	0
ENSG00000156482	eL30	RPL30	chr8	98041709	98045590	-		NODYRK1A	NOZBTB33	0
ENSG00000071082	eL31	RPL31	chr2	101002228	101006423	+		NODYRK1A	NOZBTB33	0
ENSG00000144713	eL32	RPL32	chr3	12834944	12841582	-		NODYRK1A	NOZBTB33	0
ENSG00000109475	eL34	RPL34	chr4	108620557	108630484	+		NODYRK1A	NOZBTB33	0
ENSG00000136942	uL29	RPL35	chr9	124857878	124861961	-		NODYRK1A	NOZBTB33	0
ENSG00000182899	eL33	RPL35A	chr3	197950180	197955851	+		NODYRK1A	NOZBTB33	0
ENSG00000130255	eL36	RPL36	chr19	5690334	5691667	+		NODYRK1A	NOZBTB33	0
ENSG00000241343	eL42	RPL36A	chrX	101390889	101396154	+	paralog	NODYRK1A	NOZBTB33	0
ENSG00000165502	-	RPL36AL	chr14	49618687	49620685	-	paralog (reactivated pseudogene)	NODYRK1A	NOZBTB33	0
ENSG00000145592	eL37	RPL37	chr5	40831327	40835285	-		NODYRK1A	NOZBTB33	0
ENSG00000197756	eL43	RPL37A	chr2	216498796	216501467	+		NODYRK1A	NOZBTB33	0
ENSG00000172809	eL38	RPL38	chr17	74203655	74209880	+		NODYRK1A	NOZBTB33	0
ENSG00000198918	eL39	RPL39	chrX	119786503	119791659	-	paralog	NODYRK1A	NOZBTB33	0
ENSG00000163923	-	RPL39L	chr3	187120948	187139496	-	paralog (reactivated pseudogene)	NODYRK1A	NOZBTB33	0
ENSG00000140986	-	RPL3L	chr16	1944578	1954678	-	paralog	NODYRK1A	NOZBTB33	0
ENSG00000174444	uL4	RPL4	chr15	66499314	66504855	-		NODYRK1A	NOZBTB33	0
ENSG00000221983	eL40	RPL40/UBA52	chr19	18571801	18577460	+		NODYRK1A	NOZBTB33	0
ENSG00000229117	eL41	RPL41	chr12	56116589	56117832	+		NODYRK1A	NOZBTB33	0
ENSG00000122406	uL18	RPL5	chr1	92832036	92841924	+		NODYRK1A	NOZBTB33	0
ENSG00000089009	eL6	RPL6	chr12	112405180	112409641	-		NODYRK1A	NOZBTB33	0
ENSG00000147604	uL30	RPL7	chr8	73290638	73293634	-	paralog	NODYRK1A	NOZBTB33	0
ENSG00000148303	eL8	RPL7A	chr9	133348213	133351425	+		DYRK1A	NOZBTB33	0
ENSG00000146223	-	RPL7L1	chr6	42879615	42889896	+	paralog	NODYRK1A	NOZBTB33	0
ENSG00000161016	uL2	RPL8	chr8	144789764	144792446	-		NODYRK1A	NOZBTB33	0
ENSG00000163682	uL6	RPL9	chr4	39454123	39458948	-		NODYRK1A	NOZBTB33	0
ENSG00000089157	uL10	RPLP0	chr12	120196699	120201211	-		NODYRK1A	NOZBTB33	0
ENSG00000137818	P1	RPLP1	chr15	69452819	69455545	+		NODYRK1A	NOZBTB33	0
ENSG00000177600	P2	RPLP2	chr11	809935	812876	+		NODYRK1A	NOZBTB33	0
ENSG00000124614	eS10	RPS10	chr6	34417453	34426125	-		NODYRK1A	NOZBTB33	0
ENSG00000142534	uS17	RPS11	chr19	49496364	49499712	+		DYRK1A	ZBTB33	3.31754
ENSG00000112306	eS12	RPS12	chr6	132814568	132817564	+		NODYRK1A	NOZBTB33	0
ENSG00000110700	uS15	RPS13	chr11	17074391	17077673	-		NODYRK1A	NOZBTB33	0
ENSG00000164587	uS11	RPS14	chr5	150444228	150449756	-		NODYRK1A	NOZBTB33	0
ENSG00000115268	uS19	RPS15	chr19	1438363	1440497	+		DYRK1A	ZBTB33	2.15644
ENSG00000134419	uS8	RPS15A	chr16	18782954	18790334	-		DYRK1A	NOZBTB33	0
ENSG00000105193	uS9	RPS16	chr19	39433136	39436020	-		NODYRK1A	NOZBTB33	0
ENSG00000182774	eS17	RPS17	chr15	82536749	82540544	-	two copies	NODYRK1A	NOZBTB33	0
ENSG00000231500	uS13	RPS18	chr6	33272074	33276504	+		NODYRK1A	NOZBTB33	0
ENSG00000105372	eS19	RPS19	chr19	41859917	41871416	+		DYRK1A	ZBTB33	2.00872
ENSG00000140988	uS5	RPS2	chr16	1962058	1964826	-		DYRK1A	ZBTB33	1.76588
ENSG00000008988	uS10	RPS20	chr8	56072808	56074581	-		NODYRK1A	NOZBTB33	0
ENSG00000171858	eS21	RPS21	chr20	62387064	62388520	+		NODYRK1A	NOZBTB33	0
ENSG00000186468	uS12	RPS23	chr5	82273319	82278416	-		NODYRK1A	NOZBTB33	0
ENSG00000138326	eS24	RPS24	chr10	78033759	78040716	+		NODYRK1A	NOZBTB33	0
ENSG00000118181	eS25	RPS25	chr11	119015711	119018347	-		NODYRK1A	NOZBTB33	0
ENSG00000197728	eS26	RPS26	chr12	56041901	56044223	+		NODYRK1A	NOZBTB33	0
ENSG00000177954	eS27	RPS27	chr1	153990762	153992155	+	paralog	NODYRK1A	NOZBTB33	0
ENSG00000143947	eS31	RPS27A	chr2	55231902	55235853	+		NODYRK1A	NOZBTB33	0
ENSG00000185088	-	RPS27L	chr15	63153339	63157542	-	paralog	NODYRK1A	NOZBTB33	0
ENSG00000233927	eS28	RPS28	chr19	8321499	8322396	+		DYRK1A	ZBTB33	3.265
ENSG00000213741	uS14	RPS29	chr14	49583571	49586416	-		DYRK1A	NOZBTB33	0
ENSG00000149273	uS3	RPS3	chr11	75399490	75406913	+		NODYRK1A	NOZBTB33	0
ENSG00000149806	eS30	RPS30/FAU	chr11	65120626	65122200	-		NODYRK1A	NOZBTB33	0
ENSG00000145425	eS1	RPS3A	chr4	151099572	151104652	+		DYRK1A	NOZBTB33	0
ENSG00000198034	eS4	RPS4X	chrX	72272602	72277291	-		NODYRK1A	NOZBTB33	0
ENSG00000129824	-	RPS4Y1	chrY	2841581	2866956	+	paralog	NODYRK1A	NOZBTB33	0
ENSG00000280969	-	RPS4Y2	chrY	20756067	20781032	+	paralog	NODYRK1A	NOZBTB33	0
ENSG00000083845	uS7	RPS5	chr19	58387268	58394804	+		NODYRK1A	NOZBTB33	0
ENSG00000137154	eS6	RPS6	chr9	19376255	19380237	-		DYRK1A	ZBTB33	1.77069
ENSG00000171863	eS7	RPS7	chr2	3575262	3580919	+		DYRK1A	ZBTB33	1.93917
ENSG00000142937	eS8	RPS8	chr1	44775573	44778740	+		NODYRK1A	NOZBTB33	1.91378
ENSG00000170889	uS4	RPS9	chr19	54200857	54207647	+		DYRK1A	ZBTB33	1.91378
ENSG00000168028	uS2	RPSA	chr3	39406688	39412542	+		NODYRK1A	NOZBTB33	0

## Sheet: Table S9
Name	DYRK1A-motif (this work)	DYRK1A-binding_T98G	DYRK1A-binding_HeLa	DYRK1A-binding_U2OS	TCT-motif (Parry et al., 2010)	TCT-motif (this work)	TATA-motif (Perry et al., 2005)	TBP-binding_HeLa	TBP-binding_GM12868	TBP-binding_K562	TAF1-binding_SKNSH	TBPL1-binding_K562	ZBED1-binding_K562	ZNF281-binding_HepG2	GABP-Motif (Perry et al., 2005)	GABP-binding_SKNSH	MYC-motif (this work)	MYC-binding_GM12868	SP1-motif (Perry et al., 2005)	SP1-binding_GM12868	YY1-motif (Perry et al., 2005)	YY1-binding_GM12868	YY1-binding_SKNSH
RACK1/GNB2L1	NO	NODYRK1A	NODYRK1A	NODYRK1A	ND	YES	ND	ND	ND	NOTBP	TAF1	TBPL1	NOZBED1	NOZNF281	ND	NOGABP	NO	MYC	ND	SP1	ND	NOYY1	YY1
RPL10	YES	NODYRK1A	NODYRK1A	NODYRK1A	ND	YES	YES	TBP	TBP	TBP	TAF1	NOTBPL1	ZBED1	NOZNF281	NO	NOGABP	NO	MYC	YES	SP1	NO	NOYY1	YY1
RPL10A	YES	DYRK1A	DYRK1A	DYRK1A	YES	YES	YES	TBP	TBP	TBP	TAF1	TBPL1	ZBED1	NOZNF281	NO	NOGABP	YES	MYC	NO	SP1	NO	NOYY1	YY1
RPL10L	YES	NODYRK1A	NODYRK1A	NODYRK1A	ND	ND	ND	NOTBP	NOTBP	NOTBP	NOTAF1	NOTBPL1	NOZBED1	NOZNF281	ND	NOGABP	YES	NOMYC	ND	NOSP1	ND	NOYY1	NOYY1
RPL11	NO	NODYRK1A	NODYRK1A	NODYRK1A	YES	YES	TA-like	TBP	TBP	TBP	TAF1	TBPL1	NOZBED1	NOZNF281	YES	GABP	NO	MYC	YES	SP1	YES	NOYY1	YY1
RPL12	YES	DYRK1A	DYRK1A	DYRK1A	ND	NO	YES	TBP	TBP	TBP	TAF1	NOTBPL1	ZBED1	NOZNF281	YES	GABP	YES	MYC	NO	SP1	NO	YY1	YY1
RPL13	NO	NODYRK1A	NODYRK1A	NODYRK1A	YES	YES	NO	TBP	TBP	TBP	TAF1	TBPL1	NOZBED1	NOZNF281	NO	GABP	NO	MYC	YES	SP1	YES	NOYY1	YY1
RPL13A	YES	NODYRK1A	NODYRK1A	NODYRK1A	YES	YES	TA-like	TBP	TBP	TBP	TAF1	TBPL1	NOZBED1	NOZNF281	YES	GABP	YES	MYC	YES	SP1	YES	YY1	YY1
RPL14	NO	NODYRK1A	NODYRK1A	DYRK1A	YES	YES	TA-like	TBP	TBP	TBP	TAF1	TBPL1	ZBED1	NOZNF281	NO	NOGABP	YES	MYC	YES	SP1	YES	YY1	YY1
RPL15	YES	DYRK1A	NODYRK1A	NODYRK1A	YES	YES	NO	TBP	TBP	TBP	NOTAF1	TBPL1	ZBED1	ZNF281	YES	GABP	NO	NOMYC	YES	SP1	YES	NOYY1	YY1
RPL17	YES	DYRK1A	DYRK1A	DYRK1A	ND	YES	NO	TBP	TBP	TBP	TAF1	TBPL1	NOZBED1	NOZNF281	YES	GABP	NO	MYC	NO	NOSP1	YES	NOYY1	YY1
RPL18	YES	NODYRK1A	DYRK1A	NODYRK1A	YES	YES	NO	TBP	TBP	TBP	TAF1	TBPL1	ZBED1	NOZNF281	NO	GABP	NO	MYC	YES	SP1	YES	NOYY1	YY1
RPL18A	YES	NODYRK1A	NODYRK1A	NODYRK1A	YES	YES	NO	TBP	TBP	TBP	TAF1	TBPL1	ZBED1	NOZNF281	YES	GABP	NO	MYC	YES	SP1	NO	NOYY1	YY1
RPL19	NO	NODYRK1A	NODYRK1A	NODYRK1A	ND	YES	TA-like	TBP	TBP	TBP	TAF1	TBPL1	NOZBED1	NOZNF281	YES	GABP	YES	MYC	NO	SP1	NO	NOYY1	YY1
RPL21	NO	NODYRK1A	NODYRK1A	NODYRK1A	ND	YES	NO	NOTBP	TBP	TBP	TAF1	TBPL1	NOZBED1	NOZNF281	NO	NOGABP	NO	MYC	YES	SP1	YES	NOYY1	YY1
RPL22	NO	NODYRK1A	NODYRK1A	NODYRK1A	YES	YES	NO	TBP	TBP	TBP	TAF1	TBPL1	ZBED1	NOZNF281	NO	NOGABP	YES	MYC	NO	SP1	NO	NOYY1	YY1
RPL22L1	YES	NODYRK1A	NODYRK1A	NODYRK1A	ND	YES	ND	TBP	TBP	TBP	TAF1	TBPL1	NOZBED1	NOZNF281	ND	NOGABP	NO	MYC	ND	SP1	ND	NOYY1	YY1
RPL23	YES	NODYRK1A	DYRK1A	DYRK1A	ND	YES	YES	TBP	TBP	TBP	TAF1	TBPL1	NOZBED1	ZNF281	YES	GABP	YES	MYC	YES	SP1	YES	NOYY1	YY1
RPL23A	YES	DYRK1A	DYRK1A	DYRK1A	ND	NO	TA-like	TBP	TBP	TBP	TAF1	TBPL1	NOZBED1	NOZNF281	NO	GABP	YES	MYC	NO	SP1	YES	NOYY1	YY1
RPL24	YES	DYRK1A	DYRK1A	DYRK1A	YES	YES	TA-like	TBP	TBP	TBP	TAF1	TBPL1	NOZBED1	NOZNF281	YES	GABP	NO	MYC	NO	SP1	YES	NOYY1	YY1
RPL26	YES	DYRK1A	DYRK1A	DYRK1A	YES	YES	TA-like	TBP	TBP	TBP	TAF1	NOTBPL1	NOZBED1	NOZNF281	YES	GABP	NO	MYC	NO	SP1	YES	NOYY1	YY1
RPL26L1	NO	NODYRK1A	NODYRK1A	NODYRK1A	ND	NO	ND	TBP	TBP	TBP	TAF1	TBPL1	NOZBED1	NOZNF281	ND	GABP	NO	MYC	ND	SP1	ND	NOYY1	NOYY1
RPL27	NO	NODYRK1A	NODYRK1A	DYRK1A	ND	YES	NO	TBP	TBP	TBP	TAF1	TBPL1	NOZBED1	NOZNF281	YES	GABP	NO	MYC	YES	SP1	YES	NOYY1	NOYY1
RPL27A	YES	DYRK1A	DYRK1A	DYRK1A	YES	YES	NO	TBP	TBP	TBP	NOTAF1	TBPL1	NOZBED1	NOZNF281	YES	GABP	NO	MYC	YES	SP1	NO	NOYY1	YY1
RPL28	NO	NODYRK1A	NODYRK1A	NODYRK1A	YES	YES	YES	TBP	TBP	TBP	TAF1	NOTBPL1	ZBED1	NOZNF281	YES	GABP	NO	NOMYC	YES	SP1	YES	NOYY1	YY1
RPL29	NO	NODYRK1A	NODYRK1A	DYRK1A	YES	YES	TA-like	TBP	TBP	TBP	TAF1	TBPL1	NOZBED1	NOZNF281	YES	GABP	YES	MYC	YES	SP1	YES	NOYY1	YY1
RPL3	YES	DYRK1A	NODYRK1A	DYRK1A	YES	NO	YES	TBP	TBP	TBP	TAF1	TBPL1	NOZBED1	NOZNF281	YES	GABP	NO	MYC	YES	SP1	YES	NOYY1	YY1
RPL30	NO	NODYRK1A	NODYRK1A	NODYRK1A	YES	YES	YES	TBP	TBP	TBP	TAF1	TBPL1	NOZBED1	NOZNF281	YES	GABP	YES	MYC	YES	SP1	YES	NOYY1	YY1
RPL31	YES	NODYRK1A	NODYRK1A	DYRK1A	YES	YES	NO	TBP	TBP	TBP	TAF1	TBPL1	NOZBED1	ZNF281	YES	GABP	NO	MYC	YES	SP1	NO	NOYY1	YY1
RPL32	NO	NODYRK1A	NODYRK1A	NODYRK1A	YES	YES	NO	TBP	TBP	TBP	TAF1	TBPL1	ZBED1	NOZNF281	YES	GABP	NO	MYC	NO	SP1	YES	NOYY1	YY1
RPL34	NO	NODYRK1A	NODYRK1A	NODYRK1A	YES	YES	NO	TBP	TBP	TBP	TAF1	TBPL1	NOZBED1	NOZNF281	YES	GABP	YES	MYC	YES	SP1	YES	NOYY1	YY1
RPL35	NO	NODYRK1A	DYRK1A	NODYRK1A	ND	YES	NO	TBP	TBP	TBP	TAF1	TBPL1	NOZBED1	NOZNF281	NO	GABP	NO	MYC	YES	SP1	YES	NOYY1	YY1
RPL35A	YES	NODYRK1A	NODYRK1A	NODYRK1A	YES	YES	NO	TBP	TBP	TBP	TAF1	TBPL1	ZBED1	NOZNF281	NO	GABP	YES	MYC	YES	SP1	YES	YY1	YY1
RPL36	NO	NODYRK1A	NODYRK1A	NODYRK1A	YES	NO	TA-like	TBP	TBP	TBP	TAF1	TBPL1	NOZBED1	NOZNF281	NO	GABP	NO	MYC	YES	SP1	YES	NOYY1	YY1
RPL36A	NO	NODYRK1A	NODYRK1A	NODYRK1A	ND	YES	YES	TBP	TBP	TBP	TAF1	NOTBPL1	NOZBED1	NOZNF281	YES	GABP	NO	MYC	YES	SP1	YES	NOYY1	YY1
RPL36AL	NO	NODYRK1A	NODYRK1A	NODYRK1A	ND	YES	ND	TBP	TBP	TBP	TAF1	TBPL1	NOZBED1	NOZNF281	ND	GABP	NO	NOMYC	ND	SP1	ND	NOYY1	YY1
RPL37	NO	NODYRK1A	NODYRK1A	DYRK1A	YES	YES	YES	TBP	TBP	TBP	TAF1	TBPL1	ZBED1	NOZNF281	YES	GABP	NO	MYC	YES	SP1	YES	NOYY1	YY1
RPL37A	NO	NODYRK1A	NODYRK1A	NODYRK1A	YES	YES	TA-like	TBP	TBP	TBP	TAF1	TBPL1	ZBED1	NOZNF281	YES	GABP	NO	MYC	NO	SP1	NO	NOYY1	YY1
RPL38	NO	NODYRK1A	NODYRK1A	DYRK1A	ND	YES	TA-like	NOTBP	TBP	TBP	TAF1	TBPL1	ZBED1	NOZNF281	YES	NOGABP	NO	MYC	NO	SP1	NO	NOYY1	YY1
RPL39	NO	NODYRK1A	NODYRK1A	NODYRK1A	YES	YES	NO	TBP	TBP	TBP	TAF1	NOTBPL1	NOZBED1	NOZNF281	YES	GABP	YES	MYC	YES	SP1	YES	NOYY1	YY1
RPL39L	YES	NODYRK1A	NODYRK1A	DYRK1A	ND	NO	ND	TBP	TBP	TBP	NOTAF1	NOTBPL1	ZBED1	NOZNF281	ND	GABP	NO	NOMYC	ND	SP1	ND	NOYY1	NOYY1
RPL3L	NO	NODYRK1A	NODYRK1A	NODYRK1A	ND	NO	ND	NOTBP	NOTBP	NOTBP	NOTAF1	NOTBPL1	NOZBED1	NOZNF281	ND	NOGABP	YES	NOMYC	ND	NOSP1	ND	NOYY1	NOYY1
RPL4	YES	NODYRK1A	NODYRK1A	DYRK1A	ND	YES	YES	TBP	TBP	TBP	TAF1	TBPL1	ZBED1	NOZNF281	NO	GABP	NO	MYC	YES	SP1	NO	YY1	YY1
RPL40/UBA52	YES	NODYRK1A	NODYRK1A	NODYRK1A	ND	YES	NO	TBP	TBP	TBP	TAF1	NOTBPL1	NOZBED1	NOZNF281	YES	GABP	YES	MYC	YES	SP1	NO	NOYY1	YY1
RPL41	NO	NODYRK1A	NODYRK1A	NODYRK1A	YES	YES	YES	TBP	TBP	TBP	TAF1	TBPL1	ZBED1	NOZNF281	YES	GABP	NO	MYC	YES	SP1	NO	YY1	YY1
RPL5	NO	NODYRK1A	NODYRK1A	NODYRK1A	YES	YES	YES	TBP	TBP	TBP	TAF1	TBPL1	ZBED1	ZNF281	NO	NOGABP	NO	MYC	YES	SP1	YES	NOYY1	YY1
RPL6	NO	NODYRK1A	NODYRK1A	NODYRK1A	ND	YES	TA-like	TBP	TBP	TBP	TAF1	TBPL1	ZBED1	NOZNF281	YES	GABP	NO	MYC	NO	NOSP1	YES	NOYY1	YY1
RPL7	YES	NODYRK1A	NODYRK1A	DYRK1A	ND	YES	TA-like	TBP	TBP	TBP	TAF1	TBPL1	ZBED1	NOZNF281	YES	GABP	NO	MYC	NO	SP1	YES	NOYY1	YY1
RPL7A	YES	DYRK1A	DYRK1A	DYRK1A	YES	YES	YES	TBP	TBP	TBP	TAF1	TBPL1	ZBED1	NOZNF281	NO	NOGABP	NO	MYC	YES	SP1	YES	NOYY1	YY1
RPL7L1	NO	NODYRK1A	NODYRK1A	NODYRK1A	ND	YES	ND	TBP	TBP	TBP	TAF1	TBPL1	NOZBED1	NOZNF281	ND	GABP	NO	MYC	ND	SP1	ND	YY1	YY1
RPL8	YES	NODYRK1A	NODYRK1A	DYRK1A	ND	YES	TA-like	NOTBP	NOTBP	NOTBP	TAF1	TBPL1	NOZBED1	NOZNF281	YES	GABP	NO	MYC	YES	SP1	YES	NOYY1	NOYY1
RPL9	NO	NODYRK1A	NODYRK1A	NODYRK1A	ND	YES	NO	TBP	TBP	TBP	TAF1	TBPL1	NOZBED1	NOZNF281	NO	NOGABP	NO	MYC	NO	SP1	YES	NOYY1	YY1
RPLP0	YES	NODYRK1A	NODYRK1A	NODYRK1A	YES	YES	YES	TBP	TBP	TBP	TAF1	TBPL1	NOZBED1	NOZNF281	YES	GABP	YES	MYC	NO	SP1	NO	NOYY1	YY1
RPLP1	NO	NODYRK1A	NODYRK1A	NODYRK1A	YES	YES	TA-like	TBP	TBP	TBP	TAF1	TBPL1	ZBED1	NOZNF281	YES	GABP	NO	MYC	NO	SP1	NO	NOYY1	NOYY1
RPLP2	YES	NODYRK1A	NODYRK1A	NODYRK1A	YES	YES	TA-like	TBP	TBP	TBP	TAF1	TBPL1	NOZBED1	ZNF281	NO	GABP	YES	MYC	YES	SP1	NO	NOYY1	YY1
RPS10	NO	NODYRK1A	NODYRK1A	NODYRK1A	YES	YES	NO	TBP	TBP	TBP	TAF1	TBPL1	ZBED1	NOZNF281	YES	GABP	NO	MYC	YES	SP1	YES	NOYY1	NOYY1
RPS11	YES	DYRK1A	DYRK1A	DYRK1A	ND	YES	TA-like	TBP	TBP	TBP	TAF1	TBPL1	NOZBED1	NOZNF281	YES	GABP	NO	MYC	YES	SP1	YES	NOYY1	YY1
RPS12	YES	NODYRK1A	NODYRK1A	DYRK1A	YES	YES	YES	TBP	TBP	TBP	TAF1	TBPL1	ZBED1	NOZNF281	YES	GABP	NO	MYC	NO	SP1	NO	NOYY1	YY1
RPS13	NO	NODYRK1A	NODYRK1A	NODYRK1A	ND	YES	NO	TBP	TBP	TBP	TAF1	TBPL1	ZBED1	NOZNF281	NO	GABP	NO	MYC	YES	SP1	YES	NOYY1	YY1
RPS14	NO	NODYRK1A	NODYRK1A	NODYRK1A	YES	YES	NO	TBP	TBP	TBP	TAF1	TBPL1	NOZBED1	NOZNF281	YES	GABP	NO	MYC	YES	SP1	NO	NOYY1	YY1
RPS15	YES	DYRK1A	DYRK1A	DYRK1A	ND	NO	TA-like	TBP	TBP	TBP	TAF1	TBPL1	ZBED1	NOZNF281	YES	GABP	NO	MYC	YES	SP1	YES	NOYY1	YY1
RPS15A	YES	DYRK1A	NODYRK1A	NODYRK1A	YES	YES	TA-like	TBP	TBP	TBP	TAF1	NOTBPL1	NOZBED1	NOZNF281	YES	NOGABP	NO	MYC	NO	SP1	YES	NOYY1	YY1
RPS16	NO	NODYRK1A	NODYRK1A	NODYRK1A	YES	YES	NO	TBP	TBP	TBP	TAF1	NOTBPL1	ZBED1	NOZNF281	NO	GABP	NO	MYC	YES	SP1	NO	NOYY1	NOYY1
RPS17	YES	NODYRK1A	NODYRK1A	NODYRK1A	ND	YES	TA-like	TBP	TBP	NOTBP	NOTAF1	TBPL1	NOZBED1	NOZNF281	YES	GABP	NO	MYC	YES	SP1	YES	NOYY1	NOYY1
RPS18	NO	NODYRK1A	NODYRK1A	NODYRK1A	YES	YES	YES	TBP	TBP	TBP	TAF1	TBPL1	ZBED1	NOZNF281	YES	GABP	NO	MYC	YES	SP1	NO	YY1	YY1
RPS19	YES	DYRK1A	DYRK1A	DYRK1A	YES	YES	TA-like	TBP	TBP	TBP	TAF1	NOTBPL1	ZBED1	ZNF281	NO	GABP	NO	MYC	YES	SP1	NO	NOYY1	YY1
RPS2	YES	DYRK1A	DYRK1A	NODYRK1A	YES	YES	YES	TBP	TBP	TBP	TAF1	TBPL1	ZBED1	NOZNF281	NO	GABP	YES	MYC	YES	SP1	NO	NOYY1	YY1
RPS20	NO	NODYRK1A	DYRK1A	NODYRK1A	YES	YES	YES	TBP	TBP	TBP	TAF1	TBPL1	ZBED1	NOZNF281	YES	GABP	YES	MYC	YES	SP1	NO	NOYY1	YY1
RPS21	YES	NODYRK1A	NODYRK1A	DYRK1A	YES	YES	YES	TBP	TBP	TBP	TAF1	NOTBPL1	NOZBED1	NOZNF281	YES	GABP	NO	MYC	YES	SP1	NO	NOYY1	NOYY1
RPS23	NO	NODYRK1A	NODYRK1A	DYRK1A	ND	YES	NO	TBP	TBP	TBP	TAF1	TBPL1	ZBED1	NOZNF281	YES	GABP	YES	MYC	YES	SP1	YES	NOYY1	YY1
RPS24	NO	NODYRK1A	NODYRK1A	DYRK1A	YES	YES	YES	TBP	TBP	TBP	TAF1	TBPL1	NOZBED1	NOZNF281	YES	NOGABP	NO	MYC	YES	SP1	YES	NOYY1	YY1
RPS25	NO	NODYRK1A	NODYRK1A	NODYRK1A	ND	YES	NO	TBP	TBP	TBP	TAF1	NOTBPL1	ZBED1	NOZNF281	YES	GABP	YES	MYC	NO	SP1	NO	NOYY1	YY1
RPS26	NO	NODYRK1A	NODYRK1A	NODYRK1A	ND	YES	YES	TBP	TBP	TBP	TAF1	TBPL1	NOZBED1	NOZNF281	NO	GABP	YES	MYC	NO	SP1	YES	NOYY1	YY1
RPS27	NO	NODYRK1A	NODYRK1A	NODYRK1A	YES	YES	YES	TBP	TBP	TBP	TAF1	NOTBPL1	ZBED1	NOZNF281	YES	GABP	NO	MYC	NO	SP1	YES	YY1	YY1
RPS27A	NO	NODYRK1A	NODYRK1A	NODYRK1A	ND	YES	NO	TBP	TBP	TBP	NOTAF1	NOTBPL1	NOZBED1	NOZNF281	NO	GABP	NO	MYC	YES	SP1	YES	NOYY1	YY1
RPS27L	NO	NODYRK1A	NODYRK1A	NODYRK1A	ND	NO	ND	TBP	TBP	TBP	TAF1	NOTBPL1	NOZBED1	NOZNF281	ND	GABP	NO	MYC	ND	SP1	ND	NOYY1	NOYY1
RPS28	YES	DYRK1A	DYRK1A	DYRK1A	ND	YES	YES	TBP	TBP	TBP	TAF1	TBPL1	NOZBED1	NOZNF281	YES	NOGABP	YES	MYC	YES	SP1	YES	NOYY1	YY1
RPS29	NO	DYRK1A	DYRK1A	DYRK1A	YES	YES	NO	TBP	TBP	TBP	TAF1	NOTBPL1	NOZBED1	NOZNF281	NO	NOGABP	NO	MYC	NO	SP1	NO	YY1	YY1
RPS3	NO	NODYRK1A	NODYRK1A	NODYRK1A	YES	YES	YES	TBP	TBP	TBP	TAF1	TBPL1	NOZBED1	NOZNF281	YES	GABP	NO	MYC	YES	NOSP1	YES	NOYY1	YY1
RPS30/FAU	YES	NODYRK1A	NODYRK1A	NODYRK1A	ND	ND	NO	TBP	TBP	TBP	TAF1	TBPL1	NOZBED1	NOZNF281	NO	GABP	YES	MYC	YES	SP1	YES	NOYY1	YY1
RPS3A	YES	DYRK1A	DYRK1A	DYRK1A	ND	YES	NO	TBP	TBP	TBP	TAF1	TBPL1	ZBED1	NOZNF281	YES	GABP	NO	MYC	YES	SP1	NO	NOYY1	YY1
RPS4X	NO	NODYRK1A	NODYRK1A	NODYRK1A	ND	YES	TA-like	TBP	TBP	TBP	TAF1	NOTBPL1	NOZBED1	NOZNF281	YES	GABP	NO	MYC	YES	SP1	NO	NOYY1	YY1
RPS4Y1	YES	NODYRK1A	NODYRK1A	NODYRK1A	ND	ND	ND	NOTBP	NOTBP	NOTBP	NOTAF1	NOTBPL1	NOZBED1	NOZNF281	ND	NOGABP	NO	NOMYC	ND	NOSP1	ND	NOYY1	NOYY1
RPS4Y2	YES	NODYRK1A	NODYRK1A	NODYRK1A	ND	ND	ND	NOTBP	NOTBP	NOTBP	NOTAF1	NOTBPL1	NOZBED1	NOZNF281	ND	NOGABP	NO	NOMYC	ND	NOSP1	ND	NOYY1	NOYY1
RPS5	YES	NODYRK1A	NODYRK1A	NODYRK1A	YES	YES	TA-like	TBP	TBP	TBP	TAF1	TBPL1	NOZBED1	ZNF281	YES	GABP	YES	MYC	NO	SP1	NO	NOYY1	YY1
RPS6	YES	DYRK1A	DYRK1A	DYRK1A	YES	YES	NO	TBP	TBP	TBP	TAF1	TBPL1	NOZBED1	NOZNF281	YES	GABP	NO	MYC	YES	SP1	YES	NOYY1	YY1
RPS7	YES	DYRK1A	DYRK1A	DYRK1A	YES	YES	TA-like	TBP	TBP	TBP	TAF1	TBPL1	ZBED1	NOZNF281	YES	GABP	NO	MYC	YES	SP1	NO	NOYY1	YY1
RPS8	NO	NODYRK1A	NODYRK1A	NODYRK1A	ND	YES	TA-like	TBP	TBP	TBP	TAF1	TBPL1	ZBED1	NOZNF281	NO	NOGABP	YES	MYC	YES	SP1	NO	NOYY1	YY1
RPS9	YES	DYRK1A	DYRK1A	DYRK1A	YES	YES	YES	TBP	TBP	TBP	TAF1	TBPL1	NOZBED1	NOZNF281	YES	NOGABP	NO	MYC	NO	SP1	YES	NOYY1	NOYY1
RPSA	NO	NODYRK1A	NODYRK1A	NODYRK1A	YES	YES	YES	NOTBP	NOTBP	TBP	TAF1	TBPL1	NOZBED1	NOZNF281	YES	NOGABP	YES	MYC	YES	SP1	YES	NOYY1	YY1

## Sheet: Table S10
KEGG pathways all proteins: Supp Figure 8B
Term	Overlap	p-value	Adjusted p-value	Proteins
Ribosome	127/153	3.57e-94	1.1e-91	RPL4;RPL5;RPL30;RPL3;RPL32;RPL31;RPL34;RPL8;RPL10A;RPL9;RPL6;RPL7;RPS15;RPS14;RPS17;RPS16;RPS19;RPL18A;RPL36AL;RPS18;RPL36;RPL35;RPL38;RPL37;RPS11;RPL39;RPS10;RPS13;RPS12;RPS9;RPL21;RPS7;RPS8;RPL23;RPS5;RPL22;RPS6;MRPS18A;RPSA;MRPS18C;RPL24;RPL27;RPL26;RPL29;RPL28;UBA52;MRPL18;MRPL19;MRPL16;MRPL17;MRPL14;MRPL15;RPS4Y1;MRPL12;MRPL13;MRPL10;MRPL11;MRPL20;MRPL27;MRPL28;MRPL23;MRPL24;RPL3L;MRPL21;MRP…
Spliceosome	84/134	6.821e-46	1.05e-43	ISY1;EIF4A3;HNRNPU;PRPF19;EFTUD2;SNRPD2;SNRPD1;SNRNP70;DHX15;SNRPD3;BCAS2;AQR;NCBP1;NCBP2;BUD31;THOC1;THOC3;THOC2;PLRG1;CRNKL1;CDC40;PRPF6;DDX39B;SNRPG;SRSF2;SRSF3;PPIE;SRSF4;PPIH;SNRPE;SNRPA1;RP9;SNRPF;SRSF5;SRSF6;SNRPC;SNRNP200;SRSF7;SNRPA;SNRPB;RBM22;SF3B4;SF3B5;DDX5;SF3B2;SF3B3;RBM8A;SRSF1;SNU13;U2AF1;PRPF8;PUF60;U2AF2;PCBP1;TRA2B;TRA2A;SNRPB2;HNRNPA1;SF3B1;SRSF10;SF3A3;HSPA8;PPIL1;SF3A1;HNRN…
Oxidative phosphorylation	75/133	1.463e-36	1.502e-34	NDUFA13;NDUFA12;COX4I1;TCIRG1;COX7C;UQCRFS1;ATP6V1E1;ATP6V1G1;ATP6AP1;NDUFC2;NDUFC1;SDHA;SDHB;COX6B1;COX7A2L;NDUFS8;NDUFS7;NDUFS6;NDUFS5;NDUFS4;UQCRC1;ATP6V1B2;NDUFS3;NDUFS2;NDUFS1;UQCRC2;ATP6V0D1;ATP6V1A;NDUFB9;NDUFB8;NDUFB7;NDUFB10;UQCRB;NDUFB6;NDUFB11;NDUFB5;NDUFB4;NDUFB3;NDUFB2;NDUFB1;COX7A2;UQCR10;COX5B;COX5A;UQCRH;ATP5F1A;ATP5F1B;NDUFV3;CYC1;NDUFV2;NDUFV1;ATP6V1D;ATP5MG;ATP5MF;ATP6V1F;ATP6V…
RNA transport	83/165	2.281e-35	1.757e-33	EIF4A2;EIF4A1;NUP107;NUP188;POP1;GEMIN2;FMR1;RPP30;EIF4A3;SUMO4;CASC3;PNN;XPO1;SUMO1;NUP62;XPO5;NDC1;UPF1;SEC13;NCBP1;NUP133;NCBP2;PABPC4;THOC1;THOC3;THOC2;THOC7;SRRM1;NUP93;EEF1A1;DDX39B;GEMIN4;GEMIN5;STRAP;GEMIN6;NUP98;GEMIN7;PABPC1;GEMIN8;KPNB1;NUP205;SEH1L;RBM8A;DDX20;NMD3;AAAS;NUP160;FXR1;NUP85;TPR;SMN2;SAP18;NUP43;SMN1;RAE1;PAIP1;EIF2B5;RANBP2;EIF2B4;EIF2B3;EIF2B2;ALYREF;EIF2S2;MAGOHB;EIF2S…
Proteasome	35/45	6.804e-25	2.619e-23	PSMD12;PSMD11;PSMD14;PSMD13;PSMA7;PSMB10;PSMD8;PSMB6;PSMB7;PSMB4;PSMD6;PSMD7;PSMD4;PSMB2;PSMB3;PSMD2;PSMB1;PSMD3;PSMD1;ADRM1;PSMB8;PSMB9;PSMA5;PSMA6;PSMC5;PSMA3;PSMC6;PSMA4;PSMC3;PSMA1;PSMC4;PSMA2;PSMC1;PSMC2;PSME2
Protein processing in endoplasmic reticulum	65/165	1.154e-20	3.556e-19	TRAM1;HSP90AB1;PRKCSH;SEC61A1;SEC61G;CAPN1;SEC61B;SEC62;SEC63;SKP1;PDIA3;SEC13;HSP90AA1;SSR4;SSR3;DNAJB12;MOGS;PDIA6;CKAP4;DDOST;PDIA4;DAD1;DNAJB11;CANX;MAN1B1;VCP;RPN2;HSPA4L;RPN1;SEL1L;DERL1;RRBP1;HSPBP1;HSP90B1;DNAJB2;ERLEC1;LMAN1;MAPK9;GANAB;HSPH1;BAG2;OS9;LMAN2;SSR1;UGGT1;SEC31A;BCAP31;HSPA8;HSPA5;AMFR;EIF2AK3;EIF2AK2;EIF2S1;DNAJA1;DNAJC10;DNAJA2;STT3A;HYOU1;STUB1;STT3B;CALR;P4HB;SEC24C;HSPA…
Endocytosis	58/244	3.004e-08	5.14e-07	WASHC4;TFRC;ZFYVE9;ARPC1B;ARPC1A;CLTC;ARPC5L;CLTB;CLTA;CAPZB;CHMP1B;KIF5B;CHMP1A;RAB8A;AP2M1;SH3GLB1;PDCD6IP;HLA-B;HLA-C;HLA-A;RHOA;HLA-E;DNM2;TGFBR2;RUFY1;RAB31;RAB35;CHMP4B;CHMP6;VPS28;RAB7A;RAB5C;AGAP2;EGFR;SNX3;CDC42;UBB;SMAD2;ARFGEF1;HSPA8;IQSEC1;CAV1;ARPC4;ARPC5;IGF2R;PML;RAB11B;EHD1;RAB10;EHD3;ARPC2;ARPC3;NEDD4;CAPZA1;CAPZA2;CHMP2A;HSPA1B;HSPA1A
mRNA surveillance pathway	26/91	5.912e-06	6.503e-05	SMG1;RBM8A;EIF4A3;CASC3;SMG7;PPP1CB;PNN;PPP2CB;PABPN1;PPP2R1A;SAP18;UPF1;NCBP1;CPSF1;NCBP2;PABPC4;ALYREF;MAGOHB;SRRM1;NUDT21;DDX39B;ACIN1;ETF1;RNPS1;PABPC1;PABPC1L
KEGG pathways UP in shDYRK1A: Figure 6C
Term	Overlap	p-value	Adjusted p-value	Proteins
Oxidative phosphorylation	8/133	1.183e-05	0.00364436	COX7A2L;ATP5F1A;ATP5F1B;ATP5PD;ATP5PB;SDHB;ATP5MG;COX6B1
Endocytosis	9/244	0.0001575	0.0121289	SH3GLB1;SNX3;EHD1;RAB10;RAB31;CAPZB;ZFYVE9;CHMP1B;EGFR
Protein processing in endoplasmic reticulum	5/165	0.0105995	0.362739	OS9;EIF2AK2;MOGS;UGGT1;SEC63
KEGG pathways DOWN in shDYRK1A: Figure 6C
Term	Overlap	p-value	Adjusted p-value	Proteins
Ribosome	41/153	4.80542e-49	1.48007e-46	RPL4;RPL5;RPL30;RPL3;RPL32;RPL10;RPL31;RPL34;RPL10A;RPL6;RPS4X;RPS14;RPL7A;RPS17;RPS16;RPS15A;RPS19;RPL14;RPL35;RPLP2;RPL38;RPL37;RPL15;RPL18;RPL39;RPS10;RPL17;RPS13;RPS9;RPS7;RPL13A;RPL23A;RPS25;RPL37A;RPL24;RPL27;RPS20;RPL22L1;RPL28;UBA52;RPS23
Spliceosome	10/134	4.865e-07	7.492e-05	SF3A1;PRPF38A;SNW1;PUF60;ALYREF;TRA2B;CDC5L;SRSF4;SRSF7;SRSF10
RNA transport	6/165	0.00439422	0.338355	PNN;FMR1;ALYREF;GEMIN4;NUP35;PABPC1

## Sheet: Table S11
		Experiment 1: Top3 values						Experiment 1: Normalized Top3 values						Experiment 1: log2 Normalized Top3 values						Experiment 2: Top3 values						Experiment 2: Normalized Top3 values						Experiment 2: log2 Normalized Top3 values
UniProt ID	Protein Name	shControl_1	shControl_2	shControl_3	shDYRK1A_1	shDYRK1A_2	shDYRK1A_3	shControl_1	shControl_2	shControl_3	shDYRK1A_1	shDYRK1A_2	shDYRK1A_3	shControl_1	shControl_2	shControl_3	shDYRK1A_1	shDYRK1A_2	shDYRK1A_3	shControl_1	shControl_2	shControl_3	shDYRK1A_1	shDYRK1A_2	shDYRK1A_3	shControl_1	shControl_2	shControl_3	shDYRK1A_1	shDYRK1A_2	shDYRK1A_3	shControl_1	shControl_2	shControl_3	shDYRK1A_1	shDYRK1A_2	shDYRK1A_3	meanLog_shControl_Rep6	meanLog_shDYRK1A_Rep6	log2 (FC)	p-value
P63244	RACK1/GNB2L1	4860000000	13200000000	2610000000	2510000000	1780000000	4290000000	5280000000	5890000000	4420000000	3540000000	3630000000	4810000000	32.2987	32.4564	32.0401	31.7203	31.7571	32.1648	2740000000	11300000000	6280000000	444000000	298000000	5780000000	3660000000	5170000000	4020000000	1850000000	1570000000	4700000000	31.7691	32.2669	31.9057	30.7858	30.5486	32.1305	32.1228	31.5179	-0.604922	0.0649
P27635	RPL10	5400000000	14200000000	3470000000	2860000000	2750000000	4430000000	5860000000	6330000000	5880000000	4040000000	5610000000	4980000000	32.4493	32.5592	32.4531	31.91	32.3842	32.2129	6100000000	21600000000	14200000000	527000000	365000000	9150000000	8130000000	9870000000	9110000000	2190000000	1920000000	7440000000	32.9208	33.2006	33.0846	31.0311	30.8411	32.792	32.7779	31.8619	-0.916047	0.0152
P62906	RPL10A	5300000000	12800000000	4030000000	3420000000	3230000000	4580000000	5770000000	5720000000	6830000000	4820000000	6600000000	5150000000	32.4248	32.4146	32.6694	32.1661	32.6188	32.2623	6370000000	17100000000	13600000000	674000000	611000000	9230000000	8500000000	7790000000	8690000000	2810000000	3210000000	7500000000	32.9847	32.8583	33.0164	31.3872	31.582	32.8051	32.728	32.1369	-0.591091	0.0411
NA	RPL10L	NA	NA	NA	NA	NA	NA	NA	NA	NA	NA	NA	NA	NA	NA	NA	NA	NA	NA	NA	NA	NA	NA	NA	NA	NA	NA	NA	NA	NA	NA	NA	NA	NA	NA	NA	NA	NA	NA	NA	NA
P62913	RPL11	3690000000	11000000000	2080000000	1950000000	1500000000	3090000000	4010000000	4900000000	3530000000	2750000000	3060000000	3470000000	31.9018	32.19	31.716	31.3568	31.5117	31.6941	3790000000	14400000000	8410000000	347000000	349000000	10600000000	5050000000	6580000000	5390000000	1440000000	1840000000	8590000000	32.2329	32.616	32.3279	30.4272	30.7745	32.9993	32.1641	31.4606	-0.703526	0.0649
P30050	RPL12	3080000000	8980000000	1610000000	1460000000	1230000000	2420000000	3340000000	4010000000	2730000000	2060000000	2520000000	2720000000	31.6389	31.9006	31.3444	30.942	31.2283	31.3413	3240000000	13200000000	7960000000	191000000	260000000	6560000000	4310000000	6030000000	5100000000	796000000	1370000000	5330000000	32.0065	32.4887	32.2488	29.5681	30.3511	32.312	31.938	30.9571	-0.980871	0.0411
P26373	RPL13	9070000000	23600000000	7210000000	6070000000	5480000000	8340000000	9860000000	10500000000	12200000000	8550000000	11200000000	9370000000	33.199	33.2944	33.508	32.9933	33.3801	33.1259	6290000000	19400000000	14800000000	414000000	427000000	9210000000	8380000000	8840000000	9460000000	1730000000	2250000000	7490000000	32.9649	33.0421	33.1387	30.6841	31.0672	32.8015	33.1912	32.342	-0.849163	0.132
P40429	RPL13A	4600000000	12500000000	2770000000	2730000000	2860000000	4180000000	5000000000	5580000000	4700000000	3840000000	5840000000	4690000000	32.2205	32.3787	32.1309	31.8382	32.4437	32.1281	5010000000	17100000000	13500000000	366000000	491000000	6710000000	6680000000	7790000000	8680000000	1520000000	2580000000	5460000000	32.6377	32.8588	33.0143	30.5044	31.2658	32.346	32.5402	31.7544	-0.785801	0.0411
P50914	RPL14	4800000000	12000000000	3580000000	2790000000	3080000000	4250000000	5210000000	5340000000	6070000000	3930000000	6290000000	4780000000	32.2797	32.3138	32.4993	31.8714	32.5504	32.1543	4530000000	15100000000	9180000000	285000000	349000000	6090000000	6040000000	6910000000	5890000000	1190000000	1830000000	4950000000	32.491	32.6861	32.4548	30.1447	30.7726	32.2042	32.4541	31.6163	-0.837849	0.0411
P61313	RPL15	4850000000	11900000000	3100000000	2830000000	2500000000	4000000000	5270000000	5320000000	5250000000	3980000000	5100000000	4500000000	32.2959	32.3084	32.2902	31.8904	32.2464	32.0657	3930000000	15100000000	9870000000	240000000	409000000	5420000000	5230000000	6890000000	6330000000	1000000000	2150000000	4410000000	32.2854	32.6815	32.559	29.8977	31.0047	32.0379	32.4034	31.5238	-0.879608	0.0022
P18621	RPL17	3540000000	10100000000	2760000000	2460000000	2320000000	3210000000	3850000000	4490000000	4690000000	3460000000	4740000000	3610000000	31.8404	32.0656	32.1255	31.6895	32.1431	31.7481	3960000000	15500000000	8920000000	338000000	309000000	5970000000	5280000000	7090000000	5720000000	1410000000	1630000000	4860000000	32.2978	32.7232	32.4135	30.3909	30.6004	32.1774	32.2443	31.4583	-0.786072	0.0649
Q07020	RPL18	3920000000	11200000000	3230000000	2680000000	2480000000	3610000000	4260000000	5010000000	5470000000	3770000000	5060000000	4060000000	31.9886	32.2225	32.3488	31.8136	32.2368	31.9193	5720000000	23100000000	15600000000	269000000	456000000	7940000000	7630000000	10600000000	10000000000	1120000000	2400000000	6460000000	32.8284	33.297	33.2237	30.0612	31.1609	32.5879	32.6515	31.63	-1.02154	0.0411
Q02543	RPL18A	5420000000	12100000000	3840000000	3090000000	3150000000	4400000000	5890000000	5380000000	6500000000	4360000000	6430000000	4940000000	32.4563	32.3256	32.5979	32.0202	32.5827	32.2027	3210000000	11000000000	6130000000	271000000	200000000	3980000000	4280000000	5040000000	3930000000	1130000000	1050000000	3230000000	31.9952	32.2295	31.8716	30.0703	29.9689	31.5903	32.246	31.4059	-0.840161	0.1797
P84098	RPL19	6800000000	15100000000	5270000000	4090000000	4580000000	5670000000	7390000000	6740000000	8930000000	5760000000	9340000000	6370000000	32.7826	32.651	33.0555	32.4242	33.1211	32.568	5900000000	19600000000	13300000000	461000000	517000000	8270000000	7870000000	8940000000	8550000000	1920000000	2720000000	6720000000	32.8742	33.0579	32.9932	30.8386	31.3412	32.6466	32.9024	32.1566	-0.74581	0.0649
P46778	RPL21	4560000000	12500000000	3720000000	3240000000	3190000000	3950000000	4960000000	5570000000	6300000000	4560000000	6510000000	4440000000	32.2063	32.3763	32.5519	32.0858	32.6008	32.0464	7140000000	23800000000	17000000000	579000000	991000000	9740000000	9520000000	10900000000	10900000000	2410000000	5220000000	7920000000	33.1487	33.3376	33.3424	31.1681	32.2802	32.8822	32.8272	32.1773	-0.64994	0.0887
P35268	RPL22	6580000000	15400000000	4320000000	3940000000	3300000000	5170000000	7150000000	6880000000	7330000000	5560000000	6730000000	5810000000	32.7357	32.6799	32.7711	32.3715	32.6477	32.4353	3720000000	12100000000	8490000000	199000000	492000000	5400000000	4950000000	5520000000	5440000000	827000000	2590000000	4390000000	32.2059	32.3608	32.3422	29.6236	31.2703	32.031	32.5159	31.7299	-0.786027	0.1797
Q6P5R6	RPL22L1	32800000	83200000	32500000	6710000	8310000	13500000	35600000	37100000	55100000	9460000	17000000	15200000	25.0874	25.1461	25.7164	23.1728	24.0149	23.8546	44200000	139000000	93700000	NA	732000	16400000	58900000	63300000	60000000	NA	3850000	13300000	25.8116	25.9156	25.8396	NA	21.8767	23.6647	25.5861	23.3167	-2.2694	0.0043
P62829	RPL23	4180000000	11800000000	2390000000	2540000000	2490000000	3320000000	4540000000	5260000000	4050000000	3580000000	5090000000	3730000000	32.0798	32.2915	31.9135	31.7354	32.244	31.7969	3580000000	11000000000	7050000000	317000000	385000000	5820000000	4770000000	5030000000	4520000000	1320000000	2020000000	4730000000	32.1522	32.2267	32.0728	30.2972	30.9153	32.1395	32.1228	31.5214	-0.601384	0.132
P62750	RPL23A	6100000000	15200000000	4640000000	3970000000	3680000000	5270000000	6630000000	6780000000	7860000000	5590000000	7510000000	5920000000	32.6254	32.6578	32.8721	32.3799	32.806	32.4635	6100000000	18700000000	12800000000	452000000	428000000	8820000000	8130000000	8520000000	8190000000	1880000000	2250000000	7170000000	32.9207	32.9877	32.9316	30.8095	31.069	32.7401	32.8326	32.0447	-0.787873	0.026
P83731	RPL24	4020000000	9050000000	2740000000	2460000000	2180000000	3090000000	4370000000	4040000000	4650000000	3470000000	4450000000	3470000000	32.0262	31.9113	32.1144	31.6919	32.0523	31.6926	3090000000	15600000000	8430000000	100000000	257000000	4680000000	4120000000	7130000000	5400000000	417000000	1350000000	3810000000	31.9383	32.7313	32.3308	28.637	30.3316	31.8253	32.1754	31.0384	-1.13697	0.013
P61254	RPL26	635000000	1880000000	1190000000	604000000	541000000	812000000	690000000	838000000	2020000000	851000000	1100000000	912000000	29.362	29.642	30.9115	29.665	30.04	29.7647	887000000	2620000000	1730000000	96800000	64700000	1260000000	1180000000	1190000000	1110000000	403000000	340000000	1030000000	30.1396	30.154	30.0454	28.5877	28.3429	29.9337	30.0424	29.389	-0.653432	0.132
Q9UNX3	RPL26L1	466000000	1270000000	277000000	475000000	393000000	608000000	507000000	567000000	469000000	669000000	801000000	683000000	28.917	29.08	28.806	29.317	29.5778	29.3467	172000000	519000000	367000000	24400000	17600000	419000000	229000000	237000000	235000000	102000000	92800000	341000000	27.7708	27.8189	27.8101	26.6012	26.4672	28.3444	28.3671	28.2757	-0.0914025	0.6753
P61353	RPL27	6340000000	16500000000	4500000000	4140000000	3730000000	6160000000	6890000000	7370000000	7620000000	5830000000	7610000000	6920000000	32.6827	32.7791	32.8272	32.4397	32.8261	32.688	5680000000	18000000000	14300000000	560000000	626000000	8290000000	7570000000	8240000000	9180000000	2330000000	3300000000	6740000000	32.8173	32.9397	33.0951	31.1195	31.6183	32.6499	32.8568	32.2236	-0.633242	0.026
P46776	RPL27A	4100000000	11400000000	2890000000	2500000000	2350000000	3560000000	4450000000	5110000000	4910000000	3520000000	4800000000	4000000000	32.0524	32.2502	32.1918	31.7118	32.1589	31.8957	6140000000	19200000000	12900000000	482000000	574000000	9950000000	8180000000	8740000000	8270000000	2010000000	3020000000	8090000000	32.9303	33.0258	32.9452	30.9037	31.4919	32.9131	32.5659	31.8458	-0.7201	0.026
P46779	RPL28	6200000000	13700000000	4450000000	3700000000	3130000000	5650000000	6740000000	6120000000	7550000000	5210000000	6400000000	6350000000	32.6502	32.5107	32.8137	32.2789	32.5749	32.5637	3950000000	16700000000	11600000000	278000000	427000000	5790000000	5270000000	7640000000	7420000000	1160000000	2250000000	4700000000	32.2941	32.831	32.7886	30.1117	31.0644	32.1311	32.648	31.7875	-0.860562	0.026
P47914	RPL29	5070000000	12000000000	3470000000	3060000000	3360000000	4520000000	5510000000	5370000000	5890000000	4310000000	6860000000	5080000000	32.3597	32.3214	32.4549	32.0059	32.6764	32.2429	2860000000	10400000000	7260000000	207000000	302000000	4210000000	3810000000	4760000000	4660000000	861000000	1590000000	3420000000	31.8282	32.1489	32.1163	29.6821	30.5658	31.6719	32.2049	31.4742	-0.730726	0.2381
P39023	RPL3	5150000000	12900000000	3980000000	3450000000	3540000000	4800000000	5600000000	5770000000	6740000000	4860000000	7230000000	5400000000	32.3831	32.4256	32.6499	32.1774	32.7515	32.3296	6630000000	19100000000	15400000000	534000000	730000000	8460000000	8840000000	8740000000	9860000000	2230000000	3840000000	6880000000	33.0411	33.0256	33.1996	31.052	31.8398	32.6791	32.7875	32.1382	-0.649243	0.0649
P62888	RPL30	3310000000	8200000000	2100000000	1810000000	1240000000	2900000000	3600000000	3660000000	3550000000	2550000000	2520000000	3250000000	31.7435	31.7696	31.7264	31.2453	31.2323	31.5996	2600000000	11000000000	7340000000	187000000	466000000	3650000000	3470000000	5020000000	4710000000	777000000	2450000000	2970000000	31.6906	32.2257	32.1316	29.5335	31.1919	31.4668	31.8812	31.0449	-0.83634	0.0022
P62899	RPL31	5660000000	14000000000	4010000000	3500000000	3330000000	4540000000	6160000000	6260000000	6800000000	4930000000	6790000000	5100000000	32.5196	32.5428	32.6631	32.1977	32.6606	32.2476	4520000000	14200000000	11000000000	275000000	351000000	5850000000	6030000000	6490000000	7040000000	1150000000	1850000000	4760000000	32.4892	32.5964	32.7121	30.0951	30.7827	32.148	32.5872	31.6886	-0.898587	0.026
P62910	RPL32	4440000000	10300000000	3270000000	2940000000	2870000000	3890000000	4820000000	4580000000	5540000000	4140000000	5860000000	4380000000	32.1672	32.092	32.3662	31.9457	32.4478	32.0267	5720000000	18900000000	11500000000	362000000	277000000	7800000000	7630000000	8630000000	7400000000	1510000000	1460000000	6350000000	32.8291	33.0062	32.7854	30.4908	30.4397	32.5631	32.541	31.6523	-0.888701	0.0649
P49207	RPL34	3330000000	8270000000	2460000000	2070000000	1570000000	2800000000	3620000000	3690000000	4160000000	2920000000	3200000000	3150000000	31.752	31.7809	31.9544	31.4433	31.5776	31.5508	5100000000	15400000000	11900000000	496000000	542000000	7160000000	6800000000	7050000000	7630000000	2070000000	2850000000	5820000000	32.663	32.7156	32.8282	30.9455	31.4095	32.4392	32.2823	31.561	-0.72135	0.0152
P42766	RPL35	7400000000	17400000000	5950000000	5050000000	4820000000	6380000000	8040000000	7750000000	10100000000	7110000000	9830000000	7160000000	32.9052	32.8518	33.2326	32.7268	33.195	32.7382	6970000000	25700000000	19200000000	338000000	767000000	9130000000	9290000000	11700000000	12300000000	1410000000	4040000000	7430000000	33.1138	33.4485	33.5205	30.3932	31.9105	32.7898	33.1787	32.2923	-0.886477	0.0152
P18077	RPL35A	4510000000	9340000000	2920000000	2650000000	2190000000	4320000000	4900000000	4170000000	4950000000	3730000000	4470000000	4860000000	32.1896	31.9567	32.2054	31.7983	32.0584	32.1772	3250000000	11300000000	7560000000	278000000	223000000	4990000000	4330000000	5170000000	4840000000	1160000000	1180000000	4060000000	32.0133	32.2671	32.1738	30.111	30.1311	31.9188	32.1343	31.3658	-0.768535	0.0411
Q9Y3U8	RPL36	1550000000	4460000000	1060000000	975000000	808000000	1460000000	1690000000	1990000000	1790000000	1370000000	1650000000	1640000000	30.6535	30.8921	30.7401	30.3548	30.6194	30.6112	3390000000	10700000000	7370000000	262000000	219000000	4950000000	4520000000	4870000000	4730000000	1090000000	1150000000	4020000000	32.0752	32.1816	32.1381	30.0238	30.1041	31.9048	31.4468	30.603	-0.843734	0.0152
P83881	RPL36A	3000000000	7570000000	2070000000	1960000000	1120000000	2230000000	3260000000	3380000000	3510000000	2770000000	2280000000	2510000000	31.6024	31.6547	31.7091	31.3657	31.0881	31.2228	235000000	1220000000	712000000	707000	48900000	341000000	313000000	558000000	456000000	2940000	258000000	277000000	28.2219	29.0559	28.7656	21.4892	27.9401	28.0465	30.1683	28.5254	-1.64287	0.1797
Q969Q0	RPL36AL	587000000	1400000000	432000000	397000000	267000000	502000000	638000000	623000000	732000000	560000000	545000000	564000000	29.2481	29.2154	29.4472	29.0597	29.0227	29.072	147000000	669000000	447000000	2990000	22500000	248000000	197000000	305000000	286000000	12400000	118000000	202000000	27.5505	28.1856	28.0938	23.5693	26.8201	27.5898	28.6234	27.5223	-1.10114	0.2381
P61927	RPL37	2030000000	6500000000	1110000000	1050000000	745000000	1680000000	2200000000	2900000000	1880000000	1470000000	1520000000	1890000000	31.0375	31.4334	30.809	30.4576	30.5009	30.8133	1810000000	4250000000	2310000000	228000000	174000000	2600000000	2410000000	1940000000	1480000000	951000000	918000000	2120000000	31.1687	30.8537	30.466	29.8242	29.7745	30.9792	30.9614	30.3916	-0.569766	0.0649
P61513	RPL37A	1490000000	3500000000	1340000000	940000000	695000000	943000000	1620000000	1560000000	2270000000	1320000000	1420000000	1060000000	30.5921	30.5421	31.0777	30.302	30.402	29.9802	2960000000	9450000000	7410000000	98400000	195000000	4150000000	3950000000	4320000000	4750000000	410000000	1030000000	3370000000	31.8793	32.0068	32.1443	28.611	29.9341	31.6506	31.3738	30.1466	-1.22713	0.0152
P63173	RPL38	2010000000	4570000000	1330000000	1280000000	1040000000	1630000000	2180000000	2040000000	2250000000	1800000000	2130000000	1830000000	31.0246	30.9251	31.0697	30.7458	30.9883	30.766	2510000000	9250000000	6060000000	150000000	230000000	3730000000	3350000000	4220000000	3890000000	623000000	1210000000	3030000000	31.6427	31.9757	31.8554	29.2149	30.1733	31.4976	31.4155	30.5643	-0.85123	0.026
P62891	RPL39	2070000000	6800000000	1310000000	1320000000	790000000	1960000000	2250000000	3040000000	2210000000	1850000000	1610000000	2200000000	31.0665	31.5002	31.0444	30.7888	30.5864	31.0327	1590000000	4760000000	2880000000	140000000	63400000	2000000000	2120000000	2170000000	1850000000	583000000	333000000	1620000000	30.9814	31.0169	30.782	29.1189	28.313	30.5964	31.0652	30.0727	-0.992511	0.0173
NA	RPL39L	NA	NA	NA	NA	NA	NA	NA	NA	NA	NA	NA	NA	NA	NA	NA	NA	NA	NA	NA	NA	NA	NA	NA	NA	NA	NA	NA	NA	NA	NA	NA	NA	NA	NA	NA	NA	NA	NA	NA	NA
Q92901	RPL3L	556000000	1440000000	536000000	336000000	551000000	483000000	605000000	641000000	908000000	474000000	1120000000	543000000	29.1717	29.2567	29.7583	28.8195	30.0657	29.0158	48200000	2390000000	1430000000	63900000	50700000	993000000	64200000	1090000000	918000000	266000000	267000000	808000000	25.9362	30.0214	29.7739	27.9873	27.9902	29.5891	28.9864	28.9113	-0.0751085	0.474
P36578	RPL4	5890000000	13700000000	4060000000	3800000000	3400000000	5020000000	6410000000	6100000000	6890000000	5350000000	6940000000	5640000000	32.5768	32.507	32.6814	32.3176	32.6932	32.3925	3490000000	19300000000	12700000000	247000000	515000000	4740000000	4650000000	8810000000	8120000000	1030000000	2710000000	3850000000	32.1137	33.0363	32.9197	29.9367	31.3368	31.8427	32.6391	31.7532	-0.885896	0.0649
P62987	RPL40/UBA52	NA	NA	NA	NA	NA	NA	NA	NA	NA	NA	NA	NA	NA	NA	NA	NA	NA	NA	188000000	272000000	264000000	17700000	3790000	101000000	250000000	124000000	169000000	73900000	19900000	82200000	27.8993	26.8879	27.3342	26.14	24.2484	26.2923	27.3738	25.5602	-1.81359	0.1
NA	RPL41	NA	NA	NA	NA	NA	NA	NA	NA	NA	NA	NA	NA	NA	NA	NA	NA	NA	NA	NA	NA	NA	NA	NA	NA	NA	NA	NA	NA	NA	NA	NA	NA	NA	NA	NA	NA	NA	NA	NA	NA
P46777	RPL5	7620000000	19100000000	5510000000	4610000000	4740000000	6440000000	8280000000	8540000000	9340000000	6490000000	9670000000	7240000000	32.9468	32.9919	33.1206	32.5956	33.1707	32.7527	7820000000	23600000000	17800000000	776000000	654000000	11200000000	10400000000	10800000000	11400000000	3230000000	3440000000	9090000000	33.2793	33.3271	33.4072	31.5905	31.6814	33.0824	33.1788	32.4789	-0.699954	0.0411
Q02878	RPL6	6840000000	16700000000	5270000000	4500000000	3900000000	6080000000	7430000000	7460000000	8940000000	6340000000	7960000000	6830000000	32.7906	32.7973	33.0574	32.5612	32.8901	32.6686	7770000000	23700000000	16900000000	688000000	636000000	11300000000	10400000000	10800000000	10800000000	2870000000	3350000000	9230000000	33.2699	33.3331	33.3327	31.4178	31.6409	33.103	33.0968	32.3803	-0.716558	0.039
P18124	RPL7	5990000000	15900000000	4340000000	4110000000	3930000000	5260000000	6510000000	7100000000	7360000000	5790000000	8010000000	5910000000	32.6003	32.7242	32.7765	32.4311	32.8998	32.4615	4600000000	15000000000	10700000000	442000000	412000000	6340000000	6130000000	6840000000	6860000000	1840000000	2170000000	5150000000	32.5133	32.6707	32.6753	30.78	31.0128	32.2625	32.6601	31.9746	-0.685473	0.0649
P62424	RPL7A	6440000000	15700000000	4380000000	3880000000	3490000000	5770000000	7000000000	7010000000	7420000000	5460000000	7120000000	6480000000	32.7044	32.7072	32.7892	32.3462	32.7291	32.5932	7380000000	20600000000	17300000000	263000000	914000000	8040000000	9840000000	9410000000	11100000000	1100000000	4810000000	6530000000	33.1961	33.132	33.3688	30.031	32.1642	32.6051	32.983	32.0781	-0.904821	0.0087
Q6DKI1	RPL7L1	NA	NA	NA	NA	NA	NA	NA	NA	NA	NA	NA	NA	NA	NA	NA	NA	NA	NA	3190000	4250000	4950000	325000	NA	7870000	4260000	1940000	3180000	1350000	NA	6400000	22.0222	20.8886	21.5985	20.3681	NA	22.6085	21.5031	21.4883	-0.0147932	NA
P62917	RPL8	6740000000	15300000000	4780000000	4320000000	4200000000	6070000000	7320000000	6850000000	8100000000	6080000000	8580000000	6820000000	32.7701	32.6731	32.9158	32.5009	32.9976	32.6669	4170000000	14300000000	10000000000	243000000	314000000	6280000000	5550000000	6540000000	6410000000	1010000000	1650000000	5100000000	32.371	32.6058	32.5771	29.9154	30.6205	32.2486	32.6522	31.825	-0.827166	0.2381
P32969	RPL9	1600000000	4810000000	1020000000	923000000	802000000	1320000000	1740000000	2150000000	1730000000	1300000000	1640000000	1480000000	30.6949	31.0003	30.6895	30.2754	30.6083	30.462	2860000000	9840000000	5820000000	262000000	261000000	4220000000	3820000000	4490000000	3730000000	1090000000	1370000000	3430000000	31.83	32.0645	31.796	30.0252	30.3536	31.6776	31.3459	30.567	-0.778843	0.0152
P05388	RPLP0	1720000000	5270000000	1010000000	938000000	832000000	1470000000	1870000000	2350000000	1710000000	1320000000	1700000000	1650000000	30.7966	31.1306	30.6735	30.2993	30.6609	30.624	2980000000	13400000000	8340000000	214000000	212000000	5950000000	3970000000	6130000000	5350000000	892000000	1120000000	4830000000	31.8856	32.5142	32.3156	29.7321	30.0563	32.1707	31.5527	30.5906	-0.962117	0.026
P05386	RPLP1	1300000000	5320000000	586000000	774000000	443000000	1330000000	1410000000	2370000000	994000000	1090000000	903000000	1490000000	30.3962	31.1451	29.8884	30.0214	29.7509	30.4762	312000000	2410000000	1920000000	3790000	39000000	523000000	417000000	1100000000	1230000000	15800000	205000000	425000000	28.6341	30.0358	30.1947	23.9112	27.6133	28.6632	30.0491	28.406	-1.64304	0.1797
P05387	RPLP2	8320000000	20900000000	5730000000	5550000000	4610000000	7300000000	9040000000	9330000000	9720000000	7810000000	9420000000	8210000000	33.0742	33.1194	33.178	32.8627	33.1323	32.9339	5580000000	25500000000	14300000000	233000000	536000000	8640000000	7440000000	11700000000	9190000000	972000000	2820000000	7020000000	32.7936	33.4414	33.0976	29.8567	31.3944	32.7096	33.1174	32.1483	-0.969109	0.0649
P46783	RPS10	3200000000	9210000000	1960000000	1820000000	1550000000	2890000000	3470000000	4110000000	3310000000	2570000000	3170000000	3240000000	31.6937	31.9373	31.626	31.2592	31.5613	31.5954	2770000000	10700000000	4750000000	139000000	60600000	4060000000	3690000000	4900000000	3040000000	581000000	319000000	3300000000	31.7813	32.1907	31.5024	29.1138	28.2489	31.6217	31.7886	30.5667	-1.22185	0.0152
P62280	RPS11	6730000000	17100000000	4890000000	4270000000	4200000000	5660000000	7320000000	7640000000	8280000000	6010000000	8570000000	6360000000	32.7683	32.8302	32.9473	32.4851	32.9961	32.5658	5490000000	15900000000	10900000000	703000000	517000000	7370000000	7320000000	7260000000	7020000000	2930000000	2720000000	5990000000	32.7689	32.7576	32.7085	31.4476	31.3413	32.4807	32.7968	32.2194	-0.577377	0.0584
P25398	RPS12	3060000000	8300000000	1880000000	2100000000	1680000000	2800000000	3320000000	3700000000	3180000000	2950000000	3420000000	3140000000	31.6291	31.7866	31.5655	31.4601	31.6719	31.5499	4640000000	19400000000	17800000000	780000000	541000000	7400000000	6180000000	8870000000	11400000000	3250000000	2850000000	6020000000	32.5257	33.0462	33.4099	31.5984	31.4081	32.486	32.3272	31.6957	-0.631456	0.0649
P62277	RPS13	3290000000	10500000000	2200000000	2000000000	1660000000	3270000000	3580000000	4680000000	3720000000	2820000000	3390000000	3670000000	31.7355	32.1237	31.7936	31.3939	31.6605	31.7747	3890000000	14900000000	7330000000	356000000	227000000	6580000000	5180000000	6830000000	4700000000	1480000000	1190000000	5350000000	32.2708	32.6683	32.1299	30.4642	30.1535	32.3159	32.1203	31.2938	-0.826498	0.0649
P62263	RPS14	6100000000	15100000000	3800000000	3750000000	2940000000	5180000000	6630000000	6750000000	6450000000	5290000000	5990000000	5830000000	32.6256	32.6514	32.5857	32.2998	32.4808	32.4398	3910000000	18500000000	13800000000	406000000	555000000	6940000000	5210000000	8460000000	8820000000	1690000000	2920000000	5650000000	32.2787	32.9779	33.0376	30.6541	31.4443	32.3947	32.6928	31.9523	-0.740578	0.026
P62841	RPS15	3270000000	8350000000	2210000000	2080000000	1890000000	3430000000	3560000000	3730000000	3740000000	2930000000	3850000000	3860000000	31.7274	31.7955	31.8011	31.4464	31.8428	31.8454	2410000000	7110000000	5120000000	353000000	103000000	3540000000	3210000000	3250000000	3280000000	1470000000	544000000	2880000000	31.5785	31.5962	31.6107	30.4557	29.0188	31.4232	31.6849	31.0054	-0.679525	0.3874
P62244	RPS15A	3020000000	9190000000	2060000000	2240000000	1610000000	2840000000	3280000000	4100000000	3500000000	3160000000	3290000000	3190000000	31.6114	31.9347	31.7035	31.5577	31.6134	31.5693	3970000000	11800000000	10200000000	415000000	421000000	5520000000	5300000000	5410000000	6530000000	1730000000	2210000000	4490000000	32.303	32.332	32.6049	30.6858	31.0436	32.0636	32.0816	31.4222	-0.659374	0.026
P62249	RPS16	3390000000	9970000000	2250000000	2180000000	1710000000	3290000000	3690000000	4450000000	3820000000	3070000000	3480000000	3700000000	31.7795	32.0508	31.8293	31.517	31.6969	31.7844	2720000000	13000000000	6830000000	158000000	375000000	4570000000	3620000000	5950000000	4380000000	659000000	1970000000	3720000000	31.7536	32.4692	32.028	29.2967	30.8773	31.7921	31.9851	31.1607	-0.824344	0.026
P08708	RPS17	3360000000	9340000000	1570000000	1900000000	1050000000	2900000000	3650000000	4170000000	2670000000	2680000000	2150000000	3250000000	31.7642	31.9565	31.3138	31.318	31.0003	31.5994	3270000000	13600000000	11000000000	299000000	361000000	5020000000	4370000000	6190000000	7030000000	1250000000	1900000000	4080000000	32.0236	32.5282	32.7105	30.2157	30.8222	31.9276	32.0495	31.1472	-0.902289	0.026
P62269	RPS18	9610000000	24300000000	5890000000	5370000000	5120000000	9030000000	10400000000	10900000000	9980000000	7560000000	10400000000	10100000000	33.2826	33.3371	33.2162	32.815	33.2816	33.2402	5710000000	22500000000	13700000000	635000000	500000000	8990000000	7620000000	10300000000	8750000000	2650000000	2630000000	7310000000	32.8267	33.2573	33.0273	31.3014	31.2941	32.7668	33.1579	32.4498	-0.708021	0.0996
P39019	RPS19	6060000000	15600000000	3510000000	3480000000	2410000000	5310000000	6590000000	6950000000	5940000000	4890000000	4930000000	5970000000	32.6174	32.6953	32.4687	32.1885	32.1978	32.4739	4740000000	17500000000	12100000000	395000000	471000000	6760000000	6330000000	7980000000	7790000000	1640000000	2480000000	5490000000	32.5588	32.8939	32.8583	30.615	31.208	32.355	32.6821	31.8397	-0.842337	0.0043
P15880	RPS2	3820000000	10300000000	2600000000	2550000000	1760000000	3420000000	4150000000	4620000000	4400000000	3600000000	3600000000	3840000000	31.9507	32.1049	32.0353	31.7439	31.7439	31.8391	6630000000	20500000000	13600000000	1030000000	605000000	10300000000	8840000000	9370000000	8720000000	4290000000	3180000000	8350000000	33.042	33.125	33.0219	31.9974	31.5677	32.9587	32.5466	31.9751	-0.571531	0.1797
P60866	RPS20	4120000000	14700000000	2450000000	2310000000	1900000000	3720000000	4480000000	6570000000	4160000000	3250000000	3880000000	4180000000	32.0617	32.6139	31.9536	31.598	31.8552	31.9599	7100000000	15600000000	15100000000	791000000	387000000	8840000000	9470000000	7110000000	9660000000	3300000000	2030000000	7190000000	33.1407	32.7271	33.169	31.6181	30.922	32.7429	32.611	31.7827	-0.828297	0.0411
P63220	RPS21	6130000000	11100000000	3890000000	3540000000	3200000000	5290000000	6660000000	4950000000	6580000000	4980000000	6540000000	5940000000	32.6331	32.204	32.6165	32.2132	32.6067	32.4675	1960000000	9960000000	7800000000	98000000	382000000	3090000000	2620000000	4550000000	5000000000	408000000	2010000000	2510000000	31.2869	32.0822	32.2195	28.605	30.9045	31.2271	32.1737	31.3373	-0.836371	0.3052
P62266	RPS23	6880000000	14400000000	4700000000	3890000000	4230000000	5160000000	7480000000	6430000000	7960000000	5470000000	8630000000	5800000000	32.7999	32.5828	32.8898	32.3502	33.0072	32.4322	4390000000	20600000000	11800000000	471000000	426000000	6570000000	5860000000	9430000000	7540000000	1960000000	2240000000	5340000000	32.4479	33.1343	32.8118	30.8702	31.0609	32.314	32.7777	32.0058	-0.771952	0.0411
P62847	RPS24	2730000000	5270000000	1620000000	1690000000	1380000000	2300000000	2960000000	2350000000	2740000000	2380000000	2810000000	2580000000	31.4652	31.1307	31.3533	31.1467	31.389	31.2659	1570000000	6980000000	4990000000	234000000	104000000	2360000000	2090000000	3190000000	3200000000	977000000	547000000	1920000000	30.9635	31.5695	31.5751	29.8633	29.0264	30.8403	31.3429	30.5886	-0.754287	0.0931
P62851	RPS25	5850000000	14000000000	4330000000	3570000000	3230000000	5240000000	6360000000	6250000000	7350000000	5030000000	6580000000	5880000000	32.5667	32.5413	32.7742	32.2289	32.6159	32.4537	5710000000	21500000000	15800000000	457000000	762000000	10200000000	7620000000	9830000000	10100000000	1910000000	4010000000	8310000000	32.8267	33.1951	33.2372	30.8272	31.9012	32.9515	32.8569	32.1631	-0.693774	0.0649
P62854	RPS26	5080000000	12900000000	3440000000	3250000000	3010000000	4770000000	5520000000	5780000000	5840000000	4570000000	6140000000	5360000000	32.3611	32.4282	32.4424	32.0905	32.5149	32.3203	1750000000	13500000000	8710000000	22700000	298000000	2540000000	2330000000	6170000000	5590000000	94400000	1570000000	2060000000	31.1158	32.5232	32.3792	26.4923	30.5469	30.9416	32.2083	30.8178	-1.39056	0.0931
P42677	RPS27	5480000000	14600000000	3170000000	3560000000	2650000000	5090000000	5950000000	6520000000	5380000000	5010000000	5400000000	5720000000	32.471	32.602	32.3243	32.2218	32.3314	32.4127	1500000000	5650000000	3670000000	224000000	110000000	2640000000	1990000000	2580000000	2360000000	934000000	580000000	2150000000	30.8934	31.2648	31.1331	29.7994	29.1114	31.0006	31.7814	31.1462	-0.635227	0.3874
P62979	RPS27A	1630000000	4270000000	598000000	1580000000	588000000	1790000000	1770000000	1910000000	1010000000	2230000000	1200000000	2010000000	30.7228	30.8291	29.9177	31.0539	30.1599	30.9018	160000000	1860000000	1740000000	9910000	58600000	242000000	214000000	848000000	1110000000	41300000	308000000	197000000	27.6715	29.6601	30.0515	25.2995	28.2006	27.5546	29.8088	28.8617	-0.947089	0.8983
Q71UM5	RPS27L	363000000	949000000	196000000	189000000	219000000	283000000	394000000	424000000	332000000	267000000	447000000	317000000	28.5538	28.6582	28.3078	27.9901	28.737	28.2421	392000000	1550000000	1110000000	44500000	42300000	882000000	522000000	709000000	711000000	185000000	223000000	717000000	28.9595	29.4018	29.4045	27.4654	27.7292	29.417	28.8809	28.2635	-0.617444	0.1797
P62857	RPS28	3540000000	8400000000	2120000000	2230000000	1790000000	3180000000	3850000000	3750000000	3600000000	3140000000	3650000000	3580000000	31.8429	31.8042	31.7447	31.5473	31.7663	31.7355	1710000000	9040000000	4030000000	135000000	94000000	3840000000	2280000000	4130000000	2580000000	563000000	495000000	3120000000	31.0892	31.9429	31.2671	29.0685	28.8822	31.5392	31.6152	30.7565	-0.858675	0.1797
P62273	RPS29	1060000000	2320000000	494000000	606000000	364000000	1170000000	1150000000	1040000000	837000000	854000000	742000000	1310000000	30.0997	29.9494	29.6414	29.6689	29.4674	30.288	1120000000	4870000000	3530000000	68700000	75500000	1780000000	1500000000	2220000000	2260000000	286000000	397000000	1450000000	30.4775	31.0492	31.0761	28.092	28.5662	30.4316	30.3822	29.419	-0.963227	0.0931
P23396	RPS3	4160000000	12900000000	2710000000	2780000000	2050000000	4180000000	4520000000	5750000000	4600000000	3920000000	4190000000	4700000000	32.0737	32.4199	32.0985	31.868	31.9629	32.1295	4040000000	16000000000	9480000000	409000000	287000000	7890000000	5390000000	7290000000	6080000000	1700000000	1510000000	6410000000	32.3285	32.7628	32.5006	30.6654	30.4945	32.5781	32.364	31.6164	-0.747585	0.0931
P62861	RPS30/FAU	1640000000	4100000000	1320000000	1170000000	1060000000	1620000000	1780000000	1830000000	2230000000	1650000000	2170000000	1820000000	30.7326	30.7709	31.0537	30.6181	31.0153	30.7615	2680000000	7400000000	5280000000	366000000	201000000	4460000000	3570000000	3380000000	3390000000	1520000000	1060000000	3630000000	31.7339	31.6536	31.6572	30.5053	29.975	31.7559	31.267	30.7719	-0.495118	0.1797
P61247	RPS3A	8760000000	20000000000	6070000000	5700000000	5460000000	8150000000	9520000000	8940000000	10300000000	8020000000	11100000000	9160000000	33.1479	33.0581	33.2593	32.9013	33.3751	33.0921	5770000000	19300000000	13900000000	738000000	428000000	9760000000	7690000000	8820000000	8920000000	3080000000	2250000000	7940000000	32.8403	33.0388	33.0551	31.5183	31.0682	32.8863	33.0666	32.4735	-0.593049	0.3874
P62701	RPS4X	5850000000	14100000000	3880000000	3530000000	3150000000	5190000000	6360000000	6290000000	6580000000	4970000000	6430000000	5840000000	32.5671	32.5505	32.6152	32.2105	32.5828	32.4421	5210000000	17000000000	10100000000	603000000	490000000	8320000000	6950000000	7790000000	6500000000	2510000000	2580000000	6770000000	32.6939	32.8581	32.5976	31.2276	31.2641	32.6556	32.647	32.0638	-0.583241	0.0649
P22090	RPS4Y1	210000000	531000000	127000000	231000000	124000000	232000000	228000000	237000000	216000000	325000000	252000000	260000000	27.7668	27.8209	27.6832	28.2769	27.9092	27.9549	153000000	489000000	368000000	19500000	20100000	270000000	204000000	223000000	236000000	81200000	106000000	220000000	27.6012	27.7335	27.8128	26.2745	26.6563	27.7101	27.7364	27.4636	-0.272763	0.7879
Q8TD47	RPS4Y2	NA	NA	NA	NA	NA	NA	NA	NA	NA	NA	NA	NA	NA	NA	NA	NA	NA	NA	14300000	92000000	NA	NA	NA	27900000	19100000	42000000	NA	NA	NA	22700000	24.1843	25.325	NA	NA	NA	24.4349	24.7546	24.4349	-0.319715	NA
P46782	RPS5	1190000000	4240000000	614000000	813000000	475000000	1160000000	1290000000	1890000000	1040000000	1150000000	970000000	1300000000	30.2682	30.8167	29.9549	30.0928	29.8527	30.2746	3110000000	9830000000	7840000000	311000000	190000000	5850000000	4140000000	4490000000	5030000000	1290000000	1000000000	4750000000	31.948	32.0641	32.2274	30.2696	29.9002	32.1464	31.2132	30.4227	-0.790518	0.197
P62753	RPS6	6340000000	14900000000	4400000000	4110000000	3500000000	5920000000	6890000000	6630000000	7460000000	5780000000	7150000000	6660000000	32.6812	32.6271	32.7963	32.429	32.7353	32.6318	7630000000	22500000000	15700000000	1130000000	690000000	12600000000	10200000000	10300000000	10100000000	4700000000	3630000000	10200000000	33.2443	33.2602	33.2309	32.1308	31.7577	33.2544	32.9733	32.4898	-0.483504	0.0996
P62081	RPS7	4830000000	13200000000	3020000000	2900000000	2450000000	4500000000	5250000000	5880000000	5120000000	4080000000	5000000000	5050000000	32.2889	32.4527	32.2528	31.9267	32.2192	32.235	3140000000	18800000000	10500000000	44400000	318000000	6520000000	4190000000	8580000000	6750000000	185000000	1670000000	5300000000	31.9638	32.9989	32.6528	27.4632	30.6396	32.3034	32.435	31.1312	-1.3038	0.0411
P62241	RPS8	8440000000	19100000000	5710000000	5120000000	4610000000	7430000000	9170000000	8520000000	9680000000	7210000000	9410000000	8340000000	33.0947	32.9889	33.1727	32.7471	33.1308	32.9581	5950000000	18700000000	13700000000	708000000	683000000	9660000000	7940000000	8530000000	8810000000	2950000000	3590000000	7860000000	32.8862	32.9901	33.0368	31.4587	31.7432	32.8714	33.0282	32.4849	-0.543334	0.0649
P46781	RPS9	4280000000	12700000000	2870000000	2780000000	2400000000	3910000000	4650000000	5660000000	4870000000	3920000000	4900000000	4400000000	32.115	32.3983	32.1815	31.8667	32.1893	32.0333	4930000000	14300000000	10200000000	706000000	483000000	6230000000	6570000000	6520000000	6560000000	2940000000	2540000000	5070000000	32.6128	32.6013	32.611	31.4549	31.2441	32.238	32.42	31.8377	-0.582257	0.026
P08865	RPSA	6040000000	15700000000	3670000000	3420000000	2250000000	5430000000	6560000000	7010000000	6230000000	4810000000	4600000000	6110000000	32.6117	32.706	32.5362	32.1645	32.0978	32.5075	2030000000	16200000000	9280000000	33000000	241000000	4430000000	2700000000	7380000000	5950000000	137000000	1270000000	3600000000	31.3327	32.7805	32.4693	27.0337	30.2375	31.7466	32.4061	30.9646	-1.44147	0.0411

## Sheet: Table S12
Affymetrix_ID	Gene symbol	p-value	Adj p-value	log2 (FC)
200651_at	RACK1/GNB2L1	0.000149	0.004668	0.473883
200724_at	RPL10	0.162	0.273844	-0.110353
217680_x_at	RPL10	0.607	0.709438	-0.032227
200725_x_at	RPL10	0.0323	0.087447	0.238537
200036_s_at	RPL10A	0.00819	0.036086	0.330974
217559_at	RPL10L	0.0659	0.14348	-0.0947819
200010_at	RPL11	0.00148	0.013565	0.373333
214271_x_at	RPL12	0.0154	0.05366	0.262877
200809_x_at	RPL12	0.0031	0.020075	0.332087
214351_x_at	RPL13	0.249	0.37454	0.107338
212933_x_at	RPL13	0.0348	0.092272	0.171547
212734_x_at	RPL13	0.0381	0.098249	0.210384
208929_x_at	RPL13	0.00188	0.015208	0.383412
212191_x_at	RPL13	0.0039	0.023072	0.397096
200715_x_at	RPL13A	0.56	0.670035	0.0511028
200716_x_at	RPL13A	0.00695	0.032754	0.236851
211942_x_at	RPL13A	0.00407	0.023613	0.298199
210646_x_at	RPL13A	0.000133	0.004412	0.346787
212790_x_at	RPL13A	3.62e-05	0.00282	0.39571
219138_at	RPL14	0.04	0.101421	-0.413724
213588_x_at	RPL14	0.44	0.564466	0.0885343
200074_s_at	RPL14	0.00923	0.038838	0.276561
221476_s_at	RPL15	0.581	0.687664	0.0569658
221475_s_at	RPL15	0.00142	0.01323	0.363016
200038_s_at	RPL17	0.934	0.957111	0.00665386
212270_x_at	RPL17	0.554	0.665888	0.0389504
212537_x_at	RPL17	0.175	0.289862	0.0902497
222297_x_at	RPL18	0.418	0.543542	-0.0704674
200022_at	RPL18	0.0173	0.057745	0.214027
200869_at	RPL18A	0.0676	0.146138	0.369748
200029_at	RPL19	0.00083	0.009994	0.32346
200012_x_at	RPL21	0.00254	0.018107	0.308058
214042_s_at	RPL22	0.276	0.403813	0.105851
221726_at	RPL22	0.0313	0.085648	0.173025
220960_x_at	RPL22	0.000483	0.00774	0.3213
208768_x_at	RPL22	0.00309	0.020052	0.389395
221775_x_at	RPL22	0.000376	0.00684	0.431352
200888_s_at	RPL23	0.138	0.244506	0.155645
203012_x_at	RPL23A	0.00376	0.022599	0.248166
208834_x_at	RPL23A	0.00249	0.017874	0.29616
208825_x_at	RPL23A	0.0015	0.013614	0.324086
213084_x_at	RPL23A	0.00238	0.017434	0.361526
214143_x_at	RPL24	0.692	0.77962	-0.0422281
200013_at	RPL24	0.754	0.827313	0.0167771
218830_at	RPL26L1	0.0533	0.124008	-0.220466
200025_s_at	RPL27	0.678	0.768146	-0.0293759
212044_s_at	RPL27A	0.0072	0.033354	-0.864686
203034_s_at	RPL27A	0.014	0.050436	0.19945
200003_s_at	RPL28	0.00938	0.039222	0.25451
213969_x_at	RPL29	0.0646	0.141508	0.186495
200823_x_at	RPL29	0.00101	0.011058	0.393824
201217_x_at	RPL3	0.0681	0.146977	0.172326
211073_x_at	RPL3	0.0221	0.067754	0.196973
212039_x_at	RPL3	0.00965	0.039929	0.214629
211666_x_at	RPL3	0.0121	0.045981	0.420318
200062_s_at	RPL30	0.000105	0.003948	0.489077
200963_x_at	RPL31	0.0204	0.064222	0.163084
221593_s_at	RPL31	0.157	0.267788	0.186602
200962_at	RPL31	0.202	0.321659	0.229807
200674_s_at	RPL32	0.0331	0.089004	0.176908
200026_at	RPL34	0.695	0.781698	0.0325044
200002_at	RPL35	0.0606	0.135308	0.168883
213687_s_at	RPL35A	0.217	0.338693	0.0975948
219762_s_at	RPL36	0.684	0.772892	0.0402272
201406_at	RPL36A	0.00282	0.019034	0.472616
207585_s_at	RPL36AL	0.297	0.425325	0.144546
200092_s_at	RPL37	0.0605	0.135127	0.21218
201429_s_at	RPL37A	0.338	0.466455	0.073042
202028_s_at	RPL38	0.00112	0.011652	-1.87208
221943_x_at	RPL38	0.000123	0.004238	-1.51894
202029_x_at	RPL38	0.724	0.80417	-0.0276156
208695_s_at	RPL39	0.114	0.212711	0.182532
210115_at	RPL39L	0.169	0.282518	-0.141708
206768_at	RPL3L	0.063	0.138952	-0.131286
200089_s_at	RPL4	0.00301	0.019737	0.324001
211710_x_at	RPL4	0.000349	0.006666	0.361893
201154_x_at	RPL4	0.000133	0.004412	0.432209
221700_s_at	RPL40/UBA52	0.89	0.928091	0.0144223
201492_s_at	RPL41	0.0116	0.04478	0.170957
213080_x_at	RPL5	0.595	0.699754	0.0529043
200937_s_at	RPL5	0.000338	0.006572	0.353265
200034_s_at	RPL6	0.303	0.431251	0.0796659
212042_x_at	RPL7	0.688	0.776429	0.0420513
200717_x_at	RPL7	0.0447	0.109554	0.16975
217740_x_at	RPL7A	0.152	0.261982	0.0978935
200936_at	RPL8	0.0021	0.016173	0.462937
200032_s_at	RPL9	0.716	0.7987	0.0362362
211720_x_at	RPLP0	0.00289	0.019311	0.359445
208856_x_at	RPLP0	0.00103	0.011141	0.3837
211972_x_at	RPLP0	0.00284	0.019122	0.401667
201033_x_at	RPLP0	0.000558	0.008256	0.445797
214167_s_at	RPLP0	0.00139	0.013073	0.504338
200763_s_at	RPLP1	0.00154	0.013812	0.357559
200908_s_at	RPLP2	0.00381	0.022755	-0.749442
200909_s_at	RPLP2	0.0104	0.04165	0.275606
214001_x_at	RPS10	0.00168	0.014338	-0.971669
200095_x_at	RPS10	0.892	0.929464	0.0103763
200817_x_at	RPS10	0.18	0.295861	0.0926118
213350_at	RPS11	0.00119	0.01202	-1.86279
200031_s_at	RPS11	0.0346	0.091945	0.207696
213377_x_at	RPS12	0.00934	0.039125	0.310964
200018_at	RPS13	0.000242	0.005751	0.395975
208645_s_at	RPS14	0.0133	0.048868	0.245952
200819_s_at	RPS15	0.00563	0.028675	0.167178
200781_s_at	RPS15A	0.0269	0.07728	0.234894
201258_at	RPS16	0.0539	0.124947	0.200347
213890_x_at	RPS16	0.00649	0.031366	0.287951
201665_x_at	RPS17	0.286	0.413525	0.0977265
211487_x_at	RPS17	0.0789	0.163162	0.159381
201049_s_at	RPS18	0.0442	0.10872	0.186146
202649_x_at	RPS19	0.107	0.203654	0.21966
213414_s_at	RPS19	0.00489	0.026284	0.394887
203107_x_at	RPS2	0.0076	0.034377	0.30434
212433_x_at	RPS2	0.00532	0.027692	0.339382
216247_at	RPS20	0.984	0.990424	-0.00236066
200949_x_at	RPS20	0.35	0.477672	0.0922144
214003_x_at	RPS20	0.169	0.282306	0.109033
214097_at	RPS21	0.606	0.708076	-0.0830043
200834_s_at	RPS21	0.822	0.879356	-0.0304186
200926_at	RPS23	0.00674	0.032064	0.315842
200061_s_at	RPS24	0.0162	0.055353	0.163778
200091_s_at	RPS25	0.981	0.987991	-0.00272869
217753_s_at	RPS26	0.399	0.525426	-0.254539
200741_s_at	RPS27	0.0139	0.050101	0.289616
200017_at	RPS27A	0.216	0.337801	0.115568
218007_s_at	RPS27L	0.00508	0.026927	0.480265
208902_s_at	RPS28	0.0132	0.048612	-0.258899
208904_s_at	RPS28	0.933	0.956049	-0.00842622
208903_at	RPS28	0.902	0.936268	0.00955728
201094_at	RPS29	0.272	0.399695	0.095034
208692_at	RPS3	0.00152	0.013699	0.495901
200019_s_at	RPS30/FAU	0.0315	0.086047	0.138542
201257_x_at	RPS3A	0.00231	0.017128	0.282039
212391_x_at	RPS3A	0.000487	0.007756	0.297733
213347_x_at	RPS4X	0.0408	0.102813	0.191005
200933_x_at	RPS4X	6.47e-05	0.003418	0.395418
201909_at	RPS4Y1	0.0542	0.125474	-1.66369
200024_at	RPS5	0.191	0.309143	0.159537
211690_at	RPS6	0.448	0.571932	-0.0518818
201254_x_at	RPS6	0.000217	0.005455	0.47144
209134_s_at	RPS6	6.31e-05	0.003357	0.4872
200081_s_at	RPS6	0.000254	0.005883	0.620195
213941_x_at	RPS7	0.383	0.509934	-0.0892797
200082_s_at	RPS7	0.113	0.211071	0.137647
214089_at	RPS8	0.0674	0.14581	-0.132519
200858_s_at	RPS8	0.000499	0.00784	0.408944
217747_s_at	RPS9	0.0452	0.110319	0.297693
213801_x_at	RPSA	0.963	0.975971	-0.00368868
